# Supplementary material for: Pembrolizumab as Second-Line Therapy for Advanced Hepatocellular Carcinoma: Longer Term Follow-Up from the Phase 3 KEYNOTE-240 Trial
Source: PubMed Central journal article supplement — Liver Cancer. 2023 Feb 14;12(4):309–20. doi: 10.1159/000529636 (PMC10601873; doi:10.1159/000529636), 2023-02-14

1 **Supplementary Material for Pembrolizumab as Second-Line Therapy for Advanced**  
2 **Hepatocellular Carcinoma: Longer-Term Follow-Up From the Phase 3 KEYNOTE-240**  
3 **Trial**

4 **Authors: Merle P. et al.**

5

6 **Online Supplementary Table 1.** Treatment-related AEs occurring in  $\geq 5\%$  of patients in  
7 either the pembrolizumab or placebo arm

|                                      | <b>Pembrolizumab</b> |                     | <b>Placebo</b>   |                     |
|--------------------------------------|----------------------|---------------------|------------------|---------------------|
|                                      | <b>(n = 279)</b>     |                     | <b>(n = 134)</b> |                     |
|                                      | <b>Any grade</b>     | <b>Grade 3 or 4</b> | <b>Any grade</b> | <b>Grade 3 or 4</b> |
| Any                                  | 171 (61.3)           | 54 (19.4)           | 65 (48.5)        | 10 (7.5)            |
| Pruritus                             | 39 (14.0)            | 1 (0.4)             | 7 (5.2)          | 0                   |
| Fatigue                              | 28 (10.0)            | 3 (1.1)             | 19 (14.2)        | 1 (0.7)             |
| Rash                                 | 27 (9.7)             | 4 (1.4)             | 3 (2.2)          | 0                   |
| Increased aspartate aminotransferase | 26 (9.3)             | 16 (5.7)            | 5 (3.7)          | 2 (1.5)             |
| Increased alanine aminotransferase   | 23 (8.2)             | 11 (3.9)            | 4 (3.0)          | 2 (1.5)             |
| Diarrhea                             | 23 (8.2)             | 2 (0.7)             | 8 (6.0)          | 1 (0.7)             |
| Decreased appetite                   | 16 (5.7)             | 3 (1.1)             | 9 (6.7)          | 0                   |
| Nausea                               | 15 (5.4)             | 0                   | 8 (6.0)          | 0                   |
| Asthenia                             | 9 (3.2)              | 0                   | 9 (6.7)          | 0                   |

|            |         |   |         |   |
|------------|---------|---|---------|---|
| Arthralgia | 7 (2.5) | 0 | 8 (6.0) | 0 |
|------------|---------|---|---------|---|

8

**Online Supplementary Table 2.** List of Investigators and Independent Ethics Committee

|                                                                                                                                                                          | <b>Facility Description</b>   | <b>Country</b> | <b>Protocol # - Site #</b> | <b>IEC Name and Address**</b>                                                                                                                                                      | <b>Date of Initial IRB Approval</b> | <b>Initial IRB approval number</b> |
|--------------------------------------------------------------------------------------------------------------------------------------------------------------------------|-------------------------------|----------------|----------------------------|------------------------------------------------------------------------------------------------------------------------------------------------------------------------------------|-------------------------------------|------------------------------------|
| Marcelo O Silva, M.D.<br>Hospital Universitario Austral<br>Avenida Juan Domingo Peron<br>1500<br>Pilar Provincia de Buenos Aires,<br>Buenos Aires, B1629ODT<br>Argentina | Hospital or<br>Medical Center | Argentina      | 3475-240-0001              | Comite Institucional de Evaluacion<br>de la Facultad de Ciencias<br>Biomedicas Universidad Austral<br>Avenida Juan Domingo Peron<br>1500 Pilar, Buenos Aires<br>B1629AHJ Argentina | 04-Jul-2017                         | CEI1067/16                         |
| Adrian Carlos Gadano<br>Hospital Italiano<br>Gascon 450<br>Ciudad de Buenos Aires, Buenos<br>Aires, C1181ACH<br>Argentina                                                | Hospital or<br>Medical Center | Argentina      | 3475-240-0003              | Comite de Etica de Protocolos de<br>Investigacion del Hosp. Italiano<br>Tte. Gral. Juan Domingo Peron 4191<br>1st Floor J<br>Buenos Aires, Buenos Aires C1181ACH<br>Argentina      | 17-Nov-2016                         | 2835                               |
| Martin Leandro Barrabino<br>Hospital Privado Centro Medico<br>Cordoba<br>Av.Naciones Unidas 346<br>Cordoba, Cordoba, X5016KEH<br>Argentina                               | Hospital or<br>Medical Center | Argentina      | 3475-240-0004              | Comite Institucional de Etica de<br>Investigacion en Salud IRB/IEC<br>Friuli 2786<br>Cordoba, Cordoba X5016KEH<br>Argentina                                                        | 30-Aug-2016                         | HP-529                             |

|                                                                                                                                                                                                                   |                               |           |               |                                                                                                                                                                                                             |             |                                  |
|-------------------------------------------------------------------------------------------------------------------------------------------------------------------------------------------------------------------|-------------------------------|-----------|---------------|-------------------------------------------------------------------------------------------------------------------------------------------------------------------------------------------------------------|-------------|----------------------------------|
| Stuart Roberts, M.D.<br>The Alfred Hospital<br>99 Commercial Road<br>Gastroenterology Dept. Prahran<br>Melbourne, Victoria, 3004<br>Australia                                                                     | Treatment<br>Center           | Australia | 3475-240-0022 | Sydney South West Area Health Service<br>Ethics Committee (RPAH Zone)<br>Royal Prince Alfred Hospital Research<br>Development Office, Level 3, Building 92<br>Camperdown, New South Wales 2050<br>Australia | 21-JUL-2016 | X16-0089<br>HREC/16/RPAH/1<br>07 |
| Simone I Strasser<br>Royal Prince Alfred Hospital<br>Missenden Road Building 75<br>Level 9 West<br>Level 9 AW Morrow<br>Gastroenterology and Liver<br>Centre<br>Camperdown, New South Wales,<br>2050<br>Australia | Hospital or<br>Medical Center | Australia | 3475-240-0023 | Sydney South West Area Health Service<br>Ethics Committee (RPAH Zone)<br>Royal Prince Alfred Hospital Research<br>Development Office, Level 3, Building 92<br>Camperdown, New South Wales 2050<br>Australia | 21-JUL-2016 | X16-0089<br>HREC/16/RPAH/1<br>07 |

| Primary Investigator/Facility Address*                                                                                                                                                  | Facility Description       | Country   | Protocol # - Site # | IEC Name and Address**                                                                                                                                                                                                                                                                                            | Date of Initial IRB Approval | Initial IRB approval number      |
|-----------------------------------------------------------------------------------------------------------------------------------------------------------------------------------------|----------------------------|-----------|---------------------|-------------------------------------------------------------------------------------------------------------------------------------------------------------------------------------------------------------------------------------------------------------------------------------------------------------------|------------------------------|----------------------------------|
| William Sievert, M.D.<br>Monash Health-Monash Medical Centre<br>246 Clayton Road<br>Monash Health Translation Precinct. Level 3. MHTP Building.<br>Clayton, Victoria, 3168<br>Australia | Hospital or Medical Center | Australia | 3475-240-0024       | Sydney South West Area Health Service Ethics Committee (RPAH Zone)<br>Royal Prince Alfred Hospital Research Development Office, Level 3, Building 92<br>Camperdown, New South Wales 2050<br>Australia<br>Monash Health Human Research Ethics Committee<br>246 Clayton Road<br>Clayton, Victoria 3168<br>Australia | 21-JUL-2016                  | X16-0089<br>HREC/16/R<br>PAH/107 |
| Weng Ng<br>Liverpool Hospital<br>Cnr Campbell and Goulburn Streets<br>Cancer Therapy Centre<br>Liverpool, New South Wales, 2170<br>Australia                                            | Hospital or Medical Center | Australia | 3475-240-0025       | Sydney South West Area Health Service Ethics Committee (RPAH Zone)<br>Royal Prince Alfred Hospital Research Development Office, Level 3, Building 92<br>Camperdown, New South Wales 2050<br>Australia                                                                                                             | 21-JUL-2016                  | X16-0089<br>HREC/16/R<br>PAH/107 |

|                                                                                                                                                                        |                                        |                |                      |                                                                                                                                                                                                                                                                                                                                                                                                                                                                                                                                                                                                        |                    |                             |
|------------------------------------------------------------------------------------------------------------------------------------------------------------------------|----------------------------------------|----------------|----------------------|--------------------------------------------------------------------------------------------------------------------------------------------------------------------------------------------------------------------------------------------------------------------------------------------------------------------------------------------------------------------------------------------------------------------------------------------------------------------------------------------------------------------------------------------------------------------------------------------------------|--------------------|-----------------------------|
| <p>Chris Verslype, M.D., Ph.D.<br/> UZ Leuven - Campus<br/> Gasthuisberg<br/> Herestraat 49<br/> Digestive Oncology<br/> Leuven, Vlaams-Brabant, 3000<br/> Belgium</p> | <p>Hospital or<br/> Medical Center</p> | <p>Belgium</p> | <p>3475-240-0061</p> | <p>Universitaire Ziekenhuizen Leuven<br/> Herestraat 49<br/> Ethics Committee<br/> Leuven, Vlaams-Brabant 3000<br/> Belgium<br/> Clin. Univ. Saint-Luc -Commission d'Ethique<br/> Biomédicale<br/> Avenue Hippocrate 55.14<br/> Comite d Ethique hospitalo-facultaire. Tour<br/> Harvey - niveau 0<br/> Bruxelles, Bruxelles-Capitale, Region de<br/> 1200<br/> Belgium<br/> Clin. Univ. Saint-Luc -Commission d'Ethique<br/> Biomédicale<br/> Promenade de l Alma 51 bte B1.43.03<br/> Comite d Ethique hospitalo-facultaire<br/> Bruxelles, Bruxelles-Capitale, Region de<br/> 1200<br/> Belgium</p> | <p>22-Dec-2016</p> | <p>2016/100CT<br/> /441</p> |
|------------------------------------------------------------------------------------------------------------------------------------------------------------------------|----------------------------------------|----------------|----------------------|--------------------------------------------------------------------------------------------------------------------------------------------------------------------------------------------------------------------------------------------------------------------------------------------------------------------------------------------------------------------------------------------------------------------------------------------------------------------------------------------------------------------------------------------------------------------------------------------------------|--------------------|-----------------------------|

| <b>Primary Investigator/Facility<br/>Address*</b> | <b>Facility<br/>Description</b> | <b>Country</b> | <b>Protocol # -<br/>Site #</b> | <b>IEC Name and Address**</b> | <b>Date of Initial IRB<br/>Approval</b> | <b>Initial IRB<br/>approval<br/>number</b> |
|---------------------------------------------------|---------------------------------|----------------|--------------------------------|-------------------------------|-----------------------------------------|--------------------------------------------|
|---------------------------------------------------|---------------------------------|----------------|--------------------------------|-------------------------------|-----------------------------------------|--------------------------------------------|

|                                                                                                                                                           |                                        |                |                      |                                                                                                                                                                                                                                                                                                                                                                                                                                                                                                                                                                                                                                                                                                                                                                                                                                                                            |                    |                       |
|-----------------------------------------------------------------------------------------------------------------------------------------------------------|----------------------------------------|----------------|----------------------|----------------------------------------------------------------------------------------------------------------------------------------------------------------------------------------------------------------------------------------------------------------------------------------------------------------------------------------------------------------------------------------------------------------------------------------------------------------------------------------------------------------------------------------------------------------------------------------------------------------------------------------------------------------------------------------------------------------------------------------------------------------------------------------------------------------------------------------------------------------------------|--------------------|-----------------------|
| <p>Ivan Borbath<br/> Saint-Luc UCL<br/> Av Hippocrate 10<br/> Niv. 0: Route 190<br/> Bruxelles, Bruxelles-Capitale,<br/> Region de, 1200<br/> Belgium</p> | <p>Hospital or<br/> Medical Center</p> | <p>Belgium</p> | <p>3475-240-0062</p> | <p>Clin. Univ. Saint-Luc -Commission d'Ethique<br/> Biomédicale<br/> Avenue Hippocrate 55.14<br/> Comite d Ethique hospitalo-facultaire. Tour<br/> Harvey - niveau 0<br/> Bruxelles, Bruxelles-Capitale, Region de<br/> 1200<br/> Belgium<br/> Clin. Univ. Saint-Luc -Commission d'Ethique<br/> Biomédicale<br/> Promenade de l Alma 51 bte B1.43.03<br/> Comite d Ethique hospitalo-facultaire<br/> Bruxelles, Bruxelles-Capitale, Region de<br/> 1200<br/> Belgium<br/> Clin. Univ. Saint-Luc -Commission d'Ethique<br/> Biomédicale<br/> Avenue Hippocrate 55.14<br/> Comite d Ethique hospitalo-facultaire. Tour<br/> Harvey - niveau 0<br/> Bruxelles, Bruxelles-Capitale, Region de<br/> 1200<br/> Belgium<br/> Clin. Univ. Saint-Luc -Commission d'Ethique<br/> Biomédicale<br/> Promenade de l Alma 51 bte B1.43.03<br/> Comite d Ethique hospitalo-facultaire</p> | <p>22-Dec-2016</p> | <p>2016/100CT/441</p> |
|-----------------------------------------------------------------------------------------------------------------------------------------------------------|----------------------------------------|----------------|----------------------|----------------------------------------------------------------------------------------------------------------------------------------------------------------------------------------------------------------------------------------------------------------------------------------------------------------------------------------------------------------------------------------------------------------------------------------------------------------------------------------------------------------------------------------------------------------------------------------------------------------------------------------------------------------------------------------------------------------------------------------------------------------------------------------------------------------------------------------------------------------------------|--------------------|-----------------------|



| Primary Investigator/Facility Address*                                                                                                                           | Facility Description                             | Country        | Protocol # - Site #  | IEC Name and Address**                                                                                                                                                                                                                                                                                                                                                                                                                                                                                                                                                                                                                                                                                                                                                                                                                                                                               | Date of Initial IRB Approval | Initial IRB approval number |
|------------------------------------------------------------------------------------------------------------------------------------------------------------------|--------------------------------------------------|----------------|----------------------|------------------------------------------------------------------------------------------------------------------------------------------------------------------------------------------------------------------------------------------------------------------------------------------------------------------------------------------------------------------------------------------------------------------------------------------------------------------------------------------------------------------------------------------------------------------------------------------------------------------------------------------------------------------------------------------------------------------------------------------------------------------------------------------------------------------------------------------------------------------------------------------------------|------------------------------|-----------------------------|
| <p>Hans Van Vlierberghe, Prof., DR.<br/>           UZ Gent<br/>           De Pintelaan 185<br/>           Gent, Oost-Vlaanderen, 9000<br/>           Belgium</p> | <p>Hospital or<br/>           Medical Center</p> | <p>Belgium</p> | <p>3475-240-0063</p> | <p>Universitair Ziekenhuis Gent - Ethisch Comite<br/>           C. Heymanslaan 10<br/>           Ethisch Comite<br/>           Gent, Oost-Vlaanderen 9000<br/>           Belgium<br/>           Universitair Ziekenhuis Gent - Ethisch Comite<br/>           De Pintelaan 185<br/>           Gent, Oost-Vlaanderen 9000<br/>           Belgium<br/>           Clin. Univ. Saint-Luc -Commission d'Ethique Biomédicale<br/>           Avenue Hippocrate 55.14<br/>           Comite d Ethique hospitalo-facultaire. Tour Harvey - niveau 0<br/>           Bruxelles, Bruxelles-Capitale, Region de 1200<br/>           Belgium<br/>           Clin. Univ. Saint-Luc -Commission d'Ethique Biomédicale<br/>           Promenade de l Alma 51 bte B1.43.03<br/>           Comite d Ethique hospitalo-facultaire<br/>           Bruxelles, Bruxelles-Capitale, Region de 1200<br/>           Belgium</p> | <p>22-Dec-2016</p>           | <p>2016/100CT/441</p>       |

| Primary Investigator/Facility Address*                                                                                                      | Facility Description          | Country  | Protocol # - Site # | IEC Name and Address**                                                                                                                                                                                                                                                                                                                                                                                                                                                                                                                                                                | Date of Initial IRB Approval | Initial IRB approval number |
|---------------------------------------------------------------------------------------------------------------------------------------------|-------------------------------|----------|---------------------|---------------------------------------------------------------------------------------------------------------------------------------------------------------------------------------------------------------------------------------------------------------------------------------------------------------------------------------------------------------------------------------------------------------------------------------------------------------------------------------------------------------------------------------------------------------------------------------|------------------------------|-----------------------------|
| Jean-Luc Van Laethem, Prof., DR.<br>Erasme Hospital<br>808 Route de Lennik..<br>Brussels, Bruxelles-Capitale,<br>Region de, 1070<br>Belgium | Hospital or<br>Medical Center | Belgium  | 3475-240-0064       | Comite d'Ethique Hospitalo-Facultaire<br>Erasme-ULB<br>Route de Lennik 808<br>Comite d'Ethique<br>Anderlecht, Vlaams-Brabant 1070<br>Belgium<br>Clin. Univ. Saint-Luc -Commission d'Ethique<br>Biomédicale<br>Avenue Hippocrate 55.14<br>Comite d Ethique hospitalo-facultaire. Tour<br>Harvey - niveau 0<br>Bruxelles, Bruxelles-Capitale, Region de<br>1200<br>Belgium<br>Clin. Univ. Saint-Luc -Commission d'Ethique<br>Biomédicale<br>Promenade de l Alma 51 bte B1.43.03<br>Comite d Ethique hospitalo-facultaire<br>Bruxelles, Bruxelles-Capitale, Region de<br>1200<br>Belgium | 22-Dec-2016                  | 2016/100CT/441              |
| Juan Carlos Restrepo<br>Gutierrez, M.D.<br>Hospital Pablo Tobon Uribe<br>Calle 78 B No. 69-240<br>Medellin, Antioquia, 050034<br>Colombia   | Hospital or<br>Medical Center | Colombia | 3475-240-0102       | Comite de Investigaciones y Etica en<br>Investigaciones Hospital Pablo Tobon Uribe<br>Calle 78 B n.69-240<br>Medellin, Antioquia 050034<br>Colombia                                                                                                                                                                                                                                                                                                                                                                                                                                   | 03-Jun-2016                  | Not available               |

|                                                                                                                                                                                |                                          |                 |                      |                                                                                                                                                                                                                                                                                                              |                    |                      |
|--------------------------------------------------------------------------------------------------------------------------------------------------------------------------------|------------------------------------------|-----------------|----------------------|--------------------------------------------------------------------------------------------------------------------------------------------------------------------------------------------------------------------------------------------------------------------------------------------------------------|--------------------|----------------------|
| <p>Andres Felipe Cardona<br/> Centro de Investigacion Clinica<br/> del Country<br/> Calle 83 No 16 A 43<br/> Bogota, Distrito Capital de<br/> Bogota, 110221<br/> Colombia</p> | <p>Non Hospital<br/> Clin Rsrch Site</p> | <p>Colombia</p> | <p>3475-240-0105</p> | <p>Comite de Etica en Investigacion Clinica -<br/> Clinica del Country<br/> Cra 18 No. 82-72 Piso 2<br/> Bogota, Distrito Capital de Bogota 110221<br/> Colombia<br/> Comite de Etica de Riesgo de Fractura S.A.<br/> Carrera 20 B No.74-46<br/> Bogota, Distrito Capital de Bogota 111211<br/> Colombia</p> | <p>15-Jun-2016</p> | <p>Not available</p> |
|--------------------------------------------------------------------------------------------------------------------------------------------------------------------------------|------------------------------------------|-----------------|----------------------|--------------------------------------------------------------------------------------------------------------------------------------------------------------------------------------------------------------------------------------------------------------------------------------------------------------|--------------------|----------------------|

| Primary Investigator/Facility Address*                                                                                                                                                         | Facility Description          | Country | Protocol # - Site # | IEC Name and Address**                                                                                                             | Date of Initial IRB Approval | Initial IRB approval number |
|------------------------------------------------------------------------------------------------------------------------------------------------------------------------------------------------|-------------------------------|---------|---------------------|------------------------------------------------------------------------------------------------------------------------------------|------------------------------|-----------------------------|
| Kirsten Vistisen<br>Herlev og Gentofte Hospital.<br>Borgmester Ib Juuls Vej 9<br>5 etage.Onkologisk afdeling.<br>Klinisk Forskningsenhed<br>Herlev, Hovedstaden, 2730<br>Denmark               | Hospital or<br>Medical Center | Denmark | 3475-240-0121       | De Videnskabsetiske Komiteer For Region<br>Hovedstaden<br>Kongens Vaenge 2<br>Regionsgaarden<br>Hilleroed, Denmark 3400<br>Denmark | 06-Jul-2016                  | H-16024007                  |
| Britta weber<br>Aarhus University Hospital<br>Palle Juul-Jensens Blvd 99<br>Indgang C. Plan 1. Krydspunkt<br>C108. KFE. Kraeftafdelingen<br>Aarhus N, Midtjylland, 8200<br>Denmark             | Hospital or<br>Medical Center | Denmark | 3475-240-0122       | De Videnskabsetiske Komiteer For Region<br>Hovedstaden<br>Kongens Vaenge 2<br>Regionsgaarden<br>Hilleroed, Denmark 3400<br>Denmark | 06-Jul-2016                  | H-16024007                  |
| Philippe MERLE,M.D.<br>Hopital de la Croix Rousse<br>103 Grande Rue de la Croix-<br>Rousse<br>Serv Hepato-Gastro-Enterologie.<br>Bat R. Bat Medico-Chirurgical<br>Lyon, Rhone, 69317<br>France | Hospital or<br>Medical Center | France  | 3475-240-0141       | CPP<br>44 rue Pointe Cadet<br>CHU de Saint Etienne<br>Saint-Etienne 44055<br>France                                                | 19-MAY-2016                  | 2016-17-PP                  |

|                                                                                                                                                                                                     |                               |        |               |                                                                                     |             |            |
|-----------------------------------------------------------------------------------------------------------------------------------------------------------------------------------------------------|-------------------------------|--------|---------------|-------------------------------------------------------------------------------------|-------------|------------|
| Jean-Marie Peron,M.D., Ph.D.<br>CHU Rangueil<br>1 avenue Jean Poulhes. TSA<br>50032<br>Oncol. Med. Digestive et<br>Gynecologique - Batiment H2 -<br>RDC<br>Toulouse, Haute-Garonne, 31059<br>France | Hospital or<br>Medical Center | France | 3475-240-0142 | CPP<br>44 rue Pointe Cadet<br>CHU de Saint Etienne<br>Saint-Etienne 44055<br>France | 19-MAY-2016 | 2016-17-PP |
|-----------------------------------------------------------------------------------------------------------------------------------------------------------------------------------------------------|-------------------------------|--------|---------------|-------------------------------------------------------------------------------------|-------------|------------|

| <b>Primary Investigator/Facility Address*</b>                                                                                                                                                                                   | <b>Facility Description</b>   | <b>Country</b> | <b>Protocol # - Site #</b> | <b>IEC Name and Address**</b>                                                       | <b>Date of Initial IRB Approval</b> | <b>Initial IRB approval number</b> |
|---------------------------------------------------------------------------------------------------------------------------------------------------------------------------------------------------------------------------------|-------------------------------|----------------|----------------------------|-------------------------------------------------------------------------------------|-------------------------------------|------------------------------------|
| Rodolphe Anty<br>Hopital de l Archet II C.H.U de Nice<br>151 route Saint Antoine de Ginestiere<br>Pole de Reference Hepato Gastro-<br>enterologie et Oncologie<br>Digestive niveau 5A<br>Nice, Alpes-Maritimes, 06202<br>France | Hospital or<br>Medical Center | France         | 3475-240-0143              | CPP<br>44 rue Pointe Cadet<br>CHU de Saint Etienne<br>Saint-Etienne 44055<br>France | 19-MAY-2016                         | 2016-17-PP                         |
| Violaine Ozenne/Marie Lequoy<br>CHU Hopital Saint Antoine<br>184 rue du Faubourg Saint<br>Antoine<br>Hepato Gastro enterologie<br>Paris, Paris, 75012<br>France                                                                 | Hospital or<br>Medical Center | France         | 3475-240-0144              | CPP<br>44 rue Pointe Cadet<br>CHU de Saint Etienne<br>Saint-Etienne 44055<br>France | 19-MAY-2016                         | 2016-17-PP                         |
| Thomas Decaens<br>C.H.U de Grenoble - Hopital<br>Albert Michallon<br>Boulevard de la chantourne<br>Pole Digestif, Service Hepato<br>Gastroenterologie<br>La Tronche, Isere, 38700<br>France                                     | Hospital or<br>Medical Center | France         | 3475-240-0145              | CPP<br>44 rue Pointe Cadet<br>CHU de Saint Etienne<br>Saint-Etienne 44055<br>France | 19-MAY-2016                         | 2016-17-PP                         |

|                                                                                                                                              |                               |        |               |                                                                                     |             |            |
|----------------------------------------------------------------------------------------------------------------------------------------------|-------------------------------|--------|---------------|-------------------------------------------------------------------------------------|-------------|------------|
| Mohamed Bouattour<br>Hopital Beaujon<br>100 bd du General Leclerc<br>Service d Oncologie Medicale<br>Clichy, Hauts-de-Seine, 92110<br>France | Hospital or<br>Medical Center | France | 3475-240-0146 | CPP<br>44 rue Pointe Cadet<br>CHU de Saint Etienne<br>Saint-Etienne 44055<br>France | 19-MAY-2016 | 2016-17-PP |
|----------------------------------------------------------------------------------------------------------------------------------------------|-------------------------------|--------|---------------|-------------------------------------------------------------------------------------|-------------|------------|

| Primary Investigator/Facility Address*                                                                                                                                         | Facility Description          | Country | Protocol # - Site # | IEC Name and Address**                                                              | Date of Initial IRB Approval | Initial IRB approval number |
|--------------------------------------------------------------------------------------------------------------------------------------------------------------------------------|-------------------------------|---------|---------------------|-------------------------------------------------------------------------------------|------------------------------|-----------------------------|
| Valerie Boige<br>Institut Gustave Roussy<br>114 rue Edouard Vaillant<br>Oncologie Medicale<br>Villejuif, Val-de-Marne, 94805<br>France                                         | Hospital or<br>Medical Center | France  | 3475-240-0147       | CPP<br>44 rue Pointe Cadet<br>CHU de Saint Etienne<br>Saint-Etienne 44055<br>France | 19-MAY-2016                  | 2016-17-PP                  |
| Jean-Luc Raoul/Marine Gilabert<br>Institut Paoli Calmettes.<br>232 Boulevard de Sainte-<br>Marguerite<br>Oncologie Medicale<br>Marseille, Bouches-du-Rhône,<br>13009<br>France | Hospital or<br>Medical Center | France  | 3475-240-0148       | CPP<br>44 rue Pointe Cadet<br>CHU de Saint Etienne<br>Saint-Etienne 44055<br>France | 19-MAY-2016                  | 2016-17-PP                  |
| Julien Edeline<br>Centre Eugene Marquis<br>Avenue Bataille Flandres-<br>Dunkerque<br>Oncologie Medicale<br>Rennes, Ille-et-Vilaine, 35042<br>France                            | Hospital or<br>Medical Center | France  | 3475-240-0149       | CPP<br>44 rue Pointe Cadet<br>CHU de Saint Etienne<br>Saint-Etienne 44055<br>France | 19-MAY-2016                  | 2016-17-PP                  |



|                                                                                                                                                                                                                                                                                                                   |                                                |                |                      |                                                                                                                                                                             |                    |              |
|-------------------------------------------------------------------------------------------------------------------------------------------------------------------------------------------------------------------------------------------------------------------------------------------------------------------|------------------------------------------------|----------------|----------------------|-----------------------------------------------------------------------------------------------------------------------------------------------------------------------------|--------------------|--------------|
| <p>Peter R. Galle, Prof., DR., Med.<br/>         Universitaetsmedizin der<br/>         Johannes Gutenberg-<br/>         Universitaet Mainz<br/>         Langenbeckstrasse nr 1<br/>         I Medizinische Klinik und<br/>         Poliklinik<br/>         Mainz, Rheinland-Pfalz, 55131<br/>         Germany</p> | <p>Hospital or<br/>         Medical Center</p> | <p>Germany</p> | <p>3475-240-0161</p> | <p>Ethik-Kommission der Medizinischen<br/>         Hochschule Hannover<br/>         Carl-Neuberg-Str. 1<br/>         Hannover, Niedersachsen 30625<br/>         Germany</p> | <p>14-JUN-2016</p> | <p>7142M</p> |
|-------------------------------------------------------------------------------------------------------------------------------------------------------------------------------------------------------------------------------------------------------------------------------------------------------------------|------------------------------------------------|----------------|----------------------|-----------------------------------------------------------------------------------------------------------------------------------------------------------------------------|--------------------|--------------|

| Primary Investigator/Facility Address*                                                                                                                                                                             | Facility Description       | Country | Protocol # - Site # | IEC Name and Address**                                                                                                       | Date of Initial IRB Approval | Initial IRB approval number |
|--------------------------------------------------------------------------------------------------------------------------------------------------------------------------------------------------------------------|----------------------------|---------|---------------------|------------------------------------------------------------------------------------------------------------------------------|------------------------------|-----------------------------|
| Christoph Springfeld<br>Medizinische Universitaetsklinik<br>Heidelberg<br>Im Neuenheimer Feld 410<br>Liver Cancer Center Heidelberg.<br>Innere Medizin IV<br>Heidelberg, Baden-Wuerttemberg,<br>69120<br>Germany   | Hospital or Medical Center | Germany | 3475-240-0163       | Ethik-Kommission der Medizinischen<br>Hochschule Hannover<br>Carl-Neuberg-Str. 1<br>Hannover, Niedersachsen 30625<br>Germany | 14-JUN-2016                  | 7142M                       |
| Arndt Vogel<br>Medizinische Hochschule<br>Hannover<br>Carl Neuberg Strasse 1<br>K2. H0. Raum 1420. Klinik fuer<br>Gastroenterologie Hepatologie<br>und Endokrinologie<br>Hannover, Niedersachsen, 30625<br>Germany | Hospital or Medical Center | Germany | 3475-240-0164       | Ethik-Kommission der Medizinischen<br>Hochschule Hannover<br>Carl-Neuberg-Str. 1<br>Hannover, Niedersachsen 30625<br>Germany | 14-JUN-2016                  | 7142M                       |

|                                                                                                                                                                                       |                               |         |               |                                                                                                                              |             |       |
|---------------------------------------------------------------------------------------------------------------------------------------------------------------------------------------|-------------------------------|---------|---------------|------------------------------------------------------------------------------------------------------------------------------|-------------|-------|
| Gunnar Folprecht<br>Medizinische Fakultät Carl<br>Gustav Carus der TU Dresden<br>Fetscherstrasse. 74<br>Medizinische Klinik und Poliklinik<br>I<br>Dresden, Sachsen, 01307<br>Germany | Hospital or<br>Medical Center | Germany | 3475-240-0165 | Ethik-Kommission der Medizinischen<br>Hochschule Hannover<br>Carl-Neuberg-Str. 1<br>Hannover, Niedersachsen 30625<br>Germany | 14-JUN-2016 | 7142M |
| Michael Bitzer<br>Innere Medizin I,<br>Universitätsklinikum Tuebingen<br>Otfried Mueller Str. 10<br>Tuebingen, Baden-Wuerttemberg,<br>72076<br>Germany                                | Hospital or<br>Medical Center | Germany | 3475-240-0166 | Ethik-Kommission der Medizinischen<br>Hochschule Hannover<br>Carl-Neuberg-Str. 1<br>Hannover, Niedersachsen 30625<br>Germany | 14-JUN-2016 | 7142M |

| Primary Investigator/Facility Address*                                                                                                                        | Facility Description       | Country   | Protocol # - Site # | IEC Name and Address**                                                                                                                                                            | Date of Initial IRB Approval | Initial IRB approval number |
|---------------------------------------------------------------------------------------------------------------------------------------------------------------|----------------------------|-----------|---------------------|-----------------------------------------------------------------------------------------------------------------------------------------------------------------------------------|------------------------------|-----------------------------|
| Lam Stephen Chan<br>Prince of Wales Hospital<br>30-32, Ngan Shing Street<br>The Chinese University. Dept<br>Clinical Oncology<br>Shatin, N/A, NA<br>Hong Kong | Treatment Center           | Hong Kong | 3475-240-0181       | Joint CUHK-NTEC CREC<br>8/F Lui Che Woo Clinical Sciences Building<br>Prince of Wales Hospital<br>Hong Kong, N/A na<br>Hong Kong                                                  | 16-May-2016                  | CRE-2016.262                |
| Yin Ping Tai<br>Queen Elizabeth Hospital.<br>30 Gascoigne Road<br>11F. Block R. Dept. of Clinical<br>Oncology<br>Kowloon, N/A, na<br>Hong Kong                | Hospital or Medical Center | Hong Kong | 3475-240-0182       | Kowloon Central Cluster REC/ Kowloon East<br>Cluster REC<br>Queen Elizabeth Hospital<br>Room 808 Block S<br>Hong Kong, N/A na<br>Hong Kong                                        | 06-Jun-2016                  | KC/KE-16-0071/FR-2          |
| Thomas Chung-cheung Yau<br>Queen Mary Hospital<br>102 Pokfulam Rd<br>Department of Medicine<br>Hong Kong, N/A, NULL<br>Hong Kong                              | Hospital or Medical Center | Hong Kong | 3475-240-0183       | HKU/HA HK West Cluster Institutional<br>Review Board (HKU/HA HKW IRB)<br>Room 901 Administration Block Queen<br>Mary Hospital<br>102 Pokfulam Road<br>Hong Kong, N/A<br>Hong Kong | 23-Jun-2016                  | UW 16-316                   |

|                                                                                                                                                                           |                               |         |               |                                                                                                  |             |                        |
|---------------------------------------------------------------------------------------------------------------------------------------------------------------------------|-------------------------------|---------|---------------|--------------------------------------------------------------------------------------------------|-------------|------------------------|
| Lajos Geczi<br>Országos Onkológiai Intézet<br>Rath György u 7-9<br>B Belgyógyászat-Onkológiai és<br>Klinikai Farmakológiai Osztály<br>Budapest, Budapest, 1122<br>Hungary | Hospital or<br>Medical Center | Hungary | 3475-240-0203 | Egészségügyi Tudományos Tanács<br>Szechenyi István tér 7-8<br>Budapest, Budapest 1051<br>Hungary | 12-MAY-2016 | OGYÉI/19528-<br>1/2016 |
| Zsolt Horvath,DR./Peter Arkosy<br>Debreceni Egyetem Klinikai<br>Központ<br>Nagyterdei körút 98<br>Onkológiai Tanszék<br>Debrecen, Debrecen, 4032<br>Hungary               | Hospital or<br>Medical Center | Hungary | 3475-240-0204 | Egészségügyi Tudományos Tanács<br>Szechenyi István tér 7-8<br>Budapest, Budapest 1051<br>Hungary | 12-MAY-2016 | OGYÉI/19528-<br>1/2016 |

| Primary Investigator/Facility Address*                                                                                                                       | Facility Description          | Country | Protocol # - Site # | IEC Name and Address**                                                                           | Date of Initial IRB Approval | Initial IRB approval number |
|--------------------------------------------------------------------------------------------------------------------------------------------------------------|-------------------------------|---------|---------------------|--------------------------------------------------------------------------------------------------|------------------------------|-----------------------------|
| Zsuzsanna Kahan, M.D., Ph.D.<br>Szegedi Tudományegyetem -<br>Szent-Györgyi Albert Klinikai<br>Központ<br>Koranyi fasor 12<br>Szeged, Szeged, 6720<br>Hungary | Hospital or<br>Medical Center | Hungary | 3475-240-0205       | Egészségügyi Tudományos Tanács<br>Szechenyi István tér 7-8<br>Budapest, Budapest 1051<br>Hungary | 12-MAY-2016                  | OGYÉI/19528-<br>1/2016      |
| Karoly Mahr<br>Zala Megyei Korház Pozvai<br>Telephely<br>Kulso Korház ut 1<br>Zalaegerszeg, Zalaegerszeg, 8900<br>Hungary                                    | Hospital or<br>Medical Center | Hungary | 3475-240-0206       | Egészségügyi Tudományos Tanács<br>Szechenyi István tér 7-8<br>Budapest, Budapest 1051<br>Hungary | 12-MAY-2016                  | OGYÉI/19528-<br>1/2016      |
| Laszlo Mangel, Prof.<br>Pécsi Tudományegyetem AOK<br>Edesanyak utja 17<br>Pécs, Baranya, 7624<br>Hungary                                                     | Hospital or<br>Medical Center | Hungary | 3475-240-0207       | Egészségügyi Tudományos Tanács<br>Szechenyi István tér 7-8<br>Budapest, Budapest 1051<br>Hungary | 12-MAY-2016                  | OGYÉI/19528-<br>1/2016      |
| Julia Lohinszky<br>Szemmelweis Egyetem..<br>Szentkirályi u. 46.<br>II. Belgyógyászati Klinika<br>Budapest, Budapest, 1088<br>Hungary                         | Hospital or<br>Medical Center | Hungary | 3475-240-0208       | Egészségügyi Tudományos Tanács<br>Szechenyi István tér 7-8<br>Budapest, Budapest 1051<br>Hungary | 12-MAY-2016                  | OGYÉI/19528-<br>1/2016      |

|                                                                                                           |                               |         |               |                                                                                                                  |             |               |
|-----------------------------------------------------------------------------------------------------------|-------------------------------|---------|---------------|------------------------------------------------------------------------------------------------------------------|-------------|---------------|
| Ray McDermott<br>St Vincents University Hospital<br>Elm Park<br>Dublin, Dublin, D04 YN63<br>Ireland       | Hospital or<br>Medical Center | Ireland | 3475-240-0221 | St Vincent's Hospital<br>Elm Park<br>Ethics and Medical Research Committee<br>Dublin, Dublin Dublin 4<br>Ireland | 25-MAY-2016 | Not available |
| Ravit Geva,M.D.<br>Sourasky Medical Center<br>6 Weizmann Street<br>Tel Aviv, Tell Abib, 6423906<br>Israel | Hospital or<br>Medical Center | Israel  | 3475-240-0241 | Sourasky Medical Center<br>Weizman 6<br>Helsinki Committee.<br>Tel Aviv, Tell Abib 6423906<br>Israel             | 21-Mar-2016 | 0075-16-TLV   |

| Primary Investigator/Facility Address*                                                                                                                                       | Facility Description       | Country | Protocol # - Site # | IEC Name and Address**                                                                                                                                                                                                                                        | Date of Initial IRB Approval | Initial IRB approval number |
|------------------------------------------------------------------------------------------------------------------------------------------------------------------------------|----------------------------|---------|---------------------|---------------------------------------------------------------------------------------------------------------------------------------------------------------------------------------------------------------------------------------------------------------|------------------------------|-----------------------------|
| Salomon Stemmer, Prof.<br>Rabin Medical Center [Petah-Tikva, Israel]<br>39 Jabotinski Road. Davidoff<br>Oncology Unit<br>Petah-Tiqva, HaMerkaz, 4941492<br>Israel            | Hospital or Medical Center | Israel  | 3475-240-0242       | Rabin Medical Center [Petah-Tikva, Israel]<br>39 Jabutinsky st.<br>IRB<br>Petah-Tikva, HaMerkaz 4941492<br>Israel                                                                                                                                             | 28-Mar-2016                  | 0016-16-RMC                 |
| Bruno Daniele/Domenico Germano<br>A.O. G. Rummo<br>Via dell'Angelo 1<br>Pad Sta Teresa della Croce 1st Floor U.O.C. Oncologia Medica<br>Benevento, Benevento, 82100<br>Italy | Hospital or Medical Center | Italy   | 3475-240-0262       | Comitato Etico Campania Nord<br>Contrada Amoretta<br>Biomedica Azienda Ospedaliera S.G.<br>Moscati Citta Ospedaliera pal. Uffici<br>Avellino, Avellino 83100<br>Italy                                                                                         | 26-Oct-2016                  | Not available               |
| Silvia Fanello<br>Arcispedale Santa Maria Nuova<br>Viale Risorgimento 80<br>Reggio Emilia, Reggio Emilia,<br>42123<br>Italy                                                  | Hospital or Medical Center | Italy   | 3475-240-0263       | Comitato Etico Provinciale Azienda<br>Ospedaliera Arcispedale Santa Maria<br>Nuova/I.R.C.C.S.<br>Viale Umberto I 50<br>Dip. Infrastruttura Ricerca-Statistica Edif.<br>Spallanzani. Comitato Etico Provinciale<br>Reggio Emilia, Reggio Emilia 42123<br>Italy | 17-Nov-2016                  | Not available               |



|                                                                                                                                                     |                               |       |               |                                                                                                                                              |             |               |
|-----------------------------------------------------------------------------------------------------------------------------------------------------|-------------------------------|-------|---------------|----------------------------------------------------------------------------------------------------------------------------------------------|-------------|---------------|
| Lorenza Rimassa,DR.<br>Istituto Clinico Humanitas<br>Research Hospital<br>Via Manzoni nr 56<br>Research Hospital<br>Rozzano, Milano, 20089<br>Italy | Hospital or<br>Medical Center | Italy | 3475-240-0264 | Comitato Etico Indipendente Istituto Clinico<br>Humanitas<br>Via Manzoni 56<br>Comitato Etico Indipendente<br>Rozzano, Milano 20089<br>Italy | 11-Apr-2017 | Not available |
| Norihiro Kokudo/Kiyoshi<br>Hasegawa<br>The University of Tokyo Hospital<br>7-3-1, Hongo, Bunkyo-ku<br>Tokyo, Tokyo, 113-8655<br>Japan               | Hospital or<br>Medical Center | Japan | 3475-240-0281 | the Institutional Review Board, the<br>University of Tokyo Hospital<br>7-3-1, Hongo, Bunkyo-ku<br>Tokyo, Tokyo 113-8655<br>Japan             | 26-Jul-2016 | 2016015-11X   |

| Primary Investigator/Facility Address*                                                                                         | Facility Description          | Country | Protocol # - Site # | IEC Name and Address**                                                                                                        | Date of Initial IRB Approval | Initial IRB approval number |
|--------------------------------------------------------------------------------------------------------------------------------|-------------------------------|---------|---------------------|-------------------------------------------------------------------------------------------------------------------------------|------------------------------|-----------------------------|
| Norio Isoda/Naoki Morimoto<br>Jichi Medical University Hospital<br>3311-1, Yakushiji<br>Shimotsuke, Tochigi, 329-0498<br>Japan | Hospital or<br>Medical Center | Japan   | 3475-240-0282       | Jichi Medical University Hospital<br>Institutional Review Board<br>3311-1, Yakushiji<br>Shimotsuke, Tochigi 329-0498<br>Japan | 30-Jun-2016                  | 160602                      |
| Manabu Morimoto<br>Kanagawa Cancer Center<br>2-3-2, Nakao, Asahi-ku<br>Yokohama, Kanagawa, 241-8515<br>Japan                   | Hospital or<br>Medical Center | Japan   | 3475-240-0283       | Kanagawa Cancer Center Institutional<br>Review Board<br>2-3-2, Nakao, Asahi-ku<br>Yokohama, Kanagawa 241-8515<br>Japan        | 14-Jul-2016                  | 174                         |
| Sadahisa Ogasawara<br>Chiba University Hospital<br>1-8-1, Inohana, Chuo-ku<br>Chiba, Chiba, 260-8677<br>Japan                  | Hospital or<br>Medical Center | Japan   | 3475-240-0284       | Chiba University Hospital Institutional<br>Review Board<br>1-8-1, Inohana, Chuo-ku<br>Chiba, Chiba 260-8677<br>Japan          | 01-Jul-2016                  | 028012                      |
| Ryoko Kuromatsu<br>Kurume University Hospital<br>67, Asahi-machi<br>Kurume, Fukuoka, 830-0011<br>Japan                         | Hospital or<br>Medical Center | Japan   | 3475-240-0285       | Kurume University Institutional Review<br>Board<br>67, Asahi-machi<br>Kurume, Fukuoka 830-0011<br>Japan                       | 18-May-2016                  | 216002                      |

|                                                                                                                           |                               |       |               |                                                                                                                                                                                                                                                                             |             |                  |
|---------------------------------------------------------------------------------------------------------------------------|-------------------------------|-------|---------------|-----------------------------------------------------------------------------------------------------------------------------------------------------------------------------------------------------------------------------------------------------------------------------|-------------|------------------|
| Hiroshi Aikata<br>Hiroshima University Hospital<br>1-2-3, Kasumi, Minami-ku<br>Hiroshima, Hiroshima, 734-8551<br>Japan    | Hospital or<br>Medical Center | Japan | 3475-240-0287 | Hiroshima University hospital IRB<br>1-2-3, Kasumi, Minami-ku<br>Hiroshima, Hiroshima 734-8551<br>Japan                                                                                                                                                                     | 04-Jul-2016 | 00828            |
| Kazuyoshi Ohkawa<br>Osaka International Cancer<br>Institute<br>3-1-69, Otemae, Chuo-ku<br>Osaka, Osaka, 541-8567<br>Japan | Hospital or<br>Medical Center | Japan | 3475-240-0288 | Osaka International Cancer Institute<br>Institutional Review Board<br>1-3-3, Nakamichi, Higashinari-ku<br>Osaka, Osaka 537-8511<br>Japan<br>Osaka International Cancer Institute<br>Institutional Review Board<br>3-1-69, Otemae, Chuo-ku<br>Osaka, Osaka 541-8567<br>Japan | 16-Jun-2016 | Not<br>available |

| <b>Primary Investigator/Facility Address*</b>                                                                                        | <b>Facility Description</b>   | <b>Country</b> | <b>Protocol # - Site #</b> | <b>IEC Name and Address**</b>                                                                                                                | <b>Date of Initial IRB Approval</b> | <b>Initial IRB approval number</b> |
|--------------------------------------------------------------------------------------------------------------------------------------|-------------------------------|----------------|----------------------------|----------------------------------------------------------------------------------------------------------------------------------------------|-------------------------------------|------------------------------------|
| Masatoshi Ishigami<br>Nagoya University Hospital<br>65, Tsurumai-cho, Showa-ku<br>Nagoya, Aichi, 466-8560<br>Japan                   | Hospital or<br>Medical Center | Japan          | 3475-240-0289              | Nagoya University Hospital Institutional<br>Review Board<br>65, Tsurumai-cho, Showa-ku<br>Nagoya, Aichi 466-8560<br>Japan                    | 25-Jul-2016                         | 280027                             |
| Masatoshi Kudo<br>Kindai University Hospital<br>377-2, Ohnohigashi<br>Osakasayama, Osaka, 589-8511<br>Japan                          | Hospital or<br>Medical Center | Japan          | 3475-240-0290              | Kindai University Hospital Institutional<br>Review Board<br>377-2, Ohnohigashi<br>Osakasayama, Osaka 589-8511<br>Japan                       | 28-Jun-2016                         | 1766                               |
| Kazushi Numata<br>Yokohama City University<br>Medical Center<br>4-57, Urafunecho, Minami-ku<br>Yokohama, Kanagawa, 232-0024<br>Japan | Hospital or<br>Medical Center | Japan          | 3475-240-0291              | Yokohama City University Medical Center<br>Institutional Review Board<br>4-57, Urafunecho, Minami-ku<br>Yokohama, Kanagawa 232-0024<br>Japan | 13-Jun-2016                         | 116-137                            |
| Tatsuya Yamashita<br>Kanazawa University Hospital<br>13-1, Takara-machi<br>Kanazawa, Ishikawa, 920-8641<br>Japan                     | Hospital or<br>Medical Center | Japan          | 3475-240-0292              | Kanazawa University Hospital Institutional<br>Review Board<br>13-1, Takara-machi<br>Kanazawa, Ishikawa 920-8641<br>Japan                     | 09-Jun-2016                         | 1794                               |

|                                                                                                                                                 |                               |       |               |                                                                                                                                  |             |               |
|-------------------------------------------------------------------------------------------------------------------------------------------------|-------------------------------|-------|---------------|----------------------------------------------------------------------------------------------------------------------------------|-------------|---------------|
| Sawako Uchida<br>Osaka City University Hospital<br>1-5-7, Asahi-machi, Abeno-ku<br>Osaka, Osaka, 545-8586<br>Japan                              | Hospital or<br>Medical Center | Japan | 3475-240-0293 | Osaka City University Hospital Institutional<br>Review Board<br>1-5-7, Asahi-machi, Abeno-ku<br>Osaka, Osaka 545-8586<br>Japan   | 23-Jun-2016 | Not available |
| Takako Nakajima<br>St. Marianna University School of<br>Medicine Hospital<br>2-16-1, Sugao, Miyamae-ku<br>Kawasaki, Kanagawa, 216-8511<br>Japan | Hospital or<br>Medical Center | Japan | 3475-240-0294 | St. Marianna University Group Institutional<br>Review Board<br>2-16-1, Sugao, Miyamae-ku<br>Kawasaki, Kanagawa 216-8511<br>Japan | 16-Jun-2016 | A2198大学       |

| <b>Primary Investigator/Facility Address*</b>                                                                                                                                             | <b>Facility Description</b>   | <b>Country</b> | <b>Protocol # - Site #</b> | <b>IEC Name and Address**</b>                                                                                                                                            | <b>Date of Initial IRB Approval</b> | <b>Initial IRB approval number</b> |
|-------------------------------------------------------------------------------------------------------------------------------------------------------------------------------------------|-------------------------------|----------------|----------------------------|--------------------------------------------------------------------------------------------------------------------------------------------------------------------------|-------------------------------------|------------------------------------|
| Yoshiyasu Karino<br>Hokkaido P.W.F.A.C Sapporo-<br>Kosei General Hospital<br>8-5, Kita3jyo-Higashi, Chuo-ku<br>Sapporo, Hokkaido, 060-0033<br>Japan                                       | Hospital or<br>Medical Center | Japan          | 3475-240-0295              | Sapporo-Kosei General Hospital<br>Institutional Review Board<br>8-5, Kita3jyo-Higashi, Chuo-ku<br>Sapporo, Hokkaido 060-0033<br>Japan                                    | 16-Jun-2016                         | 16-15-D                            |
| Junji Furuse<br>Kyorin University Hospital<br>6-20-2, Shinkawa<br>Mitaka, Tokyo, 181-8611<br>Japan                                                                                        | Hospital or<br>Medical Center | Japan          | 3475-240-0296              | Kyorin University Hospital Institutional<br>Review Board<br>6-20-2, Shinkawa<br>Mitaka, Tokyo 181-8611<br>Japan                                                          | 13-Jul-2016                         | 1612                               |
| Toshifumi Tada<br>Ogaki Municipal Hospital<br>4-86, Minaminokawa-cho<br>Ogaki, Gifu, 503-8502<br>Japan                                                                                    | Hospital or<br>Medical Center | Japan          | 3475-240-0297              | Ogaki Municipal Hospital Institutional<br>Review Board<br>4-86, Minaminokawa-cho<br>Ogaki, Gifu 503-8502<br>Japan                                                        | 28-Jun-2016                         | Not available                      |
| Yoshito Itoh<br>University Hospital, Kyoto<br>Prefectural University of<br>Medicine<br>465, Kajii-cho, Kawaramachi-<br>dori, Hirokojiagaru, Kamigyo-ku<br>Kyoto, Kyoto, 602-8566<br>Japan | Hospital or<br>Medical Center | Japan          | 3475-240-0298              | University Hospital, Kyoto Prefectural<br>University of Medicine IRB<br>465, Kajii-cho, Kawaramachi-dori,<br>Hirokojiagaru, Kamigyo-ku<br>Kyoto, Kyoto 602-8566<br>Japan | 13-Jul-2016                         | 2016-016                           |

|                                                                                                                                                                                       |                               |        |               |                                                                                                                                                                           |             |                |
|---------------------------------------------------------------------------------------------------------------------------------------------------------------------------------------|-------------------------------|--------|---------------|---------------------------------------------------------------------------------------------------------------------------------------------------------------------------|-------------|----------------|
| Masayuki Kurosaki<br>Musashino Red Cross Hospital<br>1-26-1, Kyonan-cho<br>Musashino, Tokyo, 180-8610<br>Japan                                                                        | Hospital or<br>Medical Center | Japan  | 3475-240-0300 | Musashino Red Cross Hospital Institutional<br>Review Board<br>1-26-1, Kyonan-cho<br>Musashino, Tokyo 180-8610<br>Japan                                                    | 10-Aug-2016 | 武病治第412<br>号-3 |
| Maria del Consuelo Diaz Romero<br>Instituto Nacional de<br>Cancerologia.<br>Av. San Fernando No. 22<br>Col. seccion XVI Delegacion<br>Tlalpan<br>Mexico City, Mexico, 14080<br>Mexico | Hospital or<br>Medical Center | Mexico | 3475-240-0324 | Comite de Etica en Investigacion del<br>Instituto Nacional de Cancerologia<br>Av. San Fernando No. 22<br>Col Seccion XVI<br>Mexico City, Distrito Federal 14080<br>Mexico | 21-Jul-2016 | CEI/1067/16    |

| Primary Investigator/Facility Address*                                                                                                                                                     | Facility Description            | Country     | Protocol # - Site # | IEC Name and Address**                                                                                                                                   | Date of Initial IRB Approval | Initial IRB approval number |
|--------------------------------------------------------------------------------------------------------------------------------------------------------------------------------------------|---------------------------------|-------------|---------------------|----------------------------------------------------------------------------------------------------------------------------------------------------------|------------------------------|-----------------------------|
| Carlos Alberto Hernandez Hernandez<br>Oaxaca Site Management Organization SC<br>Humboldt 302<br>Centro Oaxaca<br>Oaxaca, Oaxaca, 68000<br>Mexico                                           | Non Hospital<br>Clin Rsrch Site | Mexico      | 3475-240-0326       | Oaxaca Site Management Organization SC<br>Humboldt 302<br>Centro Oaxaca<br>Oaxaca, Oaxaca 68000<br>Mexico                                                | 13-May-2016                  | 141/2016                    |
| Olav Dajani<br>Oslo Universitetssykehus HF.<br>Ullevål<br>Kirkeveien 166<br>Kreftsentret<br>cytostatikaopptrekk 1. etg.<br>Oslo, Oslo, 0450<br>Norway                                      | Hospital or<br>Medical Center   | Norway      | 3475-240-0380       | REK soer-oest D<br>Gullhaugveien 1-3<br>Blindern<br>Oslo, Oslo 0484<br>Norway                                                                            | 20-May-2016                  | 2016/653                    |
| Judy Lao-Tan,M.D.<br>Cebu Doctors University Hospital<br>Gov. M. Roa Street Corner Don Jose Avila Street<br>Room 3 2nd Floor Admi Offices Building<br>Cebu City, Cebu, 6000<br>Philippines | Hospital or<br>Medical Center   | Philippines | 3475-240-0381       | Cebu Doctors' University Hospital Inst'l<br>Ethics Review Committee<br>Gov. M. Roa Street Corner Don Jose Avila Street<br>Cebu, Cebu 6000<br>Philippines | 07-Nov-2016                  | 2016-005                    |



|                                                                                                                                                                                                       |                               |             |               |                                                                                                                                                          |             |               |
|-------------------------------------------------------------------------------------------------------------------------------------------------------------------------------------------------------|-------------------------------|-------------|---------------|----------------------------------------------------------------------------------------------------------------------------------------------------------|-------------|---------------|
| Janus P. Ong, M.D.<br>The Medical City<br>2F Nursing Tower, Ortigas Avenue<br>Center for Liver Disease<br>Management & Transplantation<br>Pasig City, National Capital<br>Region, 1605<br>Philippines | Hospital or<br>Medical Center | Philippines | 3475-240-0384 | The Medical City Institutional Review Board<br>Podium Bldg. Lower Ground 49<br>Ortigas Avenue<br>Pasig City, National Capital Region 1605<br>Philippines | 28-Jul-2016 | Not available |
|-------------------------------------------------------------------------------------------------------------------------------------------------------------------------------------------------------|-------------------------------|-------------|---------------|----------------------------------------------------------------------------------------------------------------------------------------------------------|-------------|---------------|

| Primary Investigator/Facility Address*                                                                                                                                                                                   | Facility Description         | Country | Protocol # - Site # | IEC Name and Address**                                                                                                                                                                                                                                         | Date of Initial IRB Approval | Initial IRB approval number |
|--------------------------------------------------------------------------------------------------------------------------------------------------------------------------------------------------------------------------|------------------------------|---------|---------------------|----------------------------------------------------------------------------------------------------------------------------------------------------------------------------------------------------------------------------------------------------------------|------------------------------|-----------------------------|
| Renata Zaucha, Prof./Ewa Szutowicz-Zielinska<br>Uniwersyteckie Centrum Kliniczne<br>Smoluchowskiego 17 St..<br>Klinika Onkologii i Radioterapii<br>Centrum Medycyny Nieinwazyjnej<br>Gdansk, Pomorskie, 80-214<br>Poland | Treatment Center             | Poland  | 3475-240-0403       | Niezalezna Komisja Bioetyczna ds. Badan Naukowych AM Gdansk<br>ul. M. Sklodowskiej-Curie 3a<br>Gdansk, Pomorskie 80-210<br>Poland<br>Niezalezna Komisja Bioetczna ds. Badan Naukowych przy GUM<br>ul. Sklodowsk-Curie 3a<br>Gdansk, Pomorskie 80-210<br>Poland | 22-Jun-2016                  | NKBBN/186/2016              |
| Leszek Kraj<br>MTZ Clinical Research Sp. z o. o.<br>ul. Pawinskiego 5<br>Warsaw, Mazowieckie, 02-106<br>Poland                                                                                                           | Non Hospital Clin Rsrch Site | Poland  | 3475-240-0406       | Niezalezna Komisja Bioetyczna ds. Badan Naukowych AM Gdansk<br>ul. M. Sklodowskiej-Curie 3a<br>Gdansk, Pomorskie 80-210<br>Poland<br>Niezalezna Komisja Bioetczna ds. Badan Naukowych przy GUM<br>ul. Sklodowsk-Curie 3a<br>Gdansk, Pomorskie 80-210<br>Poland | 22-JUN-2016                  | NKBBN/186/2016              |

|                                                                                                                                             |                                          |                    |                      |                                                                                                                                                                                                                                                                                                                                                                      |                    |                    |
|---------------------------------------------------------------------------------------------------------------------------------------------|------------------------------------------|--------------------|----------------------|----------------------------------------------------------------------------------------------------------------------------------------------------------------------------------------------------------------------------------------------------------------------------------------------------------------------------------------------------------------------|--------------------|--------------------|
| <p>Hector A. Velez-Cortes,M.D.<br/> Ad-Vance Medical Research LLC<br/> 1217 Hostos Avenue<br/> Suite 101<br/> Ponce, PR, 00717<br/> USA</p> | <p>Non Hospital<br/> Clin Rsrch Site</p> | <p>Puerto Rico</p> | <p>3475-240-0441</p> | <p>Copernicus Group Independent Review<br/> Board<br/> 5000 Centregreen Way<br/> Suite 200<br/> Cary, NC 27513<br/> USA<br/> Copernicus Group Independent Review<br/> Board<br/> One Triangle Drive, Suite 100<br/> Durham, NC 27709<br/> USA<br/> WIRB-Copernicus Group WCG<br/> One Triangle Park<br/> Ste. 100<br/> Research Triangle Park, NC 27709<br/> USA</p> | <p>24-Mar-2016</p> | <p>MER1-16-040</p> |
|---------------------------------------------------------------------------------------------------------------------------------------------|------------------------------------------|--------------------|----------------------|----------------------------------------------------------------------------------------------------------------------------------------------------------------------------------------------------------------------------------------------------------------------------------------------------------------------------------------------------------------------|--------------------|--------------------|

| Primary Investigator/Facility Address*                                                                                                                   | Facility Description       | Country     | Protocol # - Site # | IEC Name and Address**                                                                                                                                                                                       | Date of Initial IRB Approval | Initial IRB approval number                                                         |
|----------------------------------------------------------------------------------------------------------------------------------------------------------|----------------------------|-------------|---------------------|--------------------------------------------------------------------------------------------------------------------------------------------------------------------------------------------------------------|------------------------------|-------------------------------------------------------------------------------------|
| Edgardo J Rodriguez-Monge<br>San Juan Bautista School of Medicine Clinical Research Unit<br>Road 172 Turabo Gardens<br>Caguas, PR, 00725<br>USA          | Treatment Center           | Puerto Rico | 3475-240-0442       | Western Institutional Review Board<br>1019 39th Avenue SE<br>Suite 120<br>Puyallup, WA 98374<br>USA<br>WIRB-Copernicus Group WCG<br>One Triangle Park<br>Ste. 100<br>Research Triangle Park, NC 27709<br>USA | 25-Oct-2016                  | Study Num:<br>1169269 WIRB<br>PRO NUM:<br>20160210<br>ONLINE TRACKING:<br>11-358778 |
| Valeriy Vladimirovich Breder<br>Russian Oncological Research Center n.a. N.N.Blokhin of MoH<br>24 Kashirskoye shosse<br>Moscow, Moskva, 115478<br>Russia | Hospital or Medical Center | Russia      | 3475-240-0481       | Russian Oncological Research Center n.a.<br>N.N.Blokhin of MoH<br>24 Kashirskoe shosse.<br>Moscow, Moskva 115478<br>Russia                                                                                   | 14-Jun-2016                  | Not available                                                                       |
| Mikhail Yurievich Byakhov/Tatyana Barannikova<br>SBHI Moscow Clinical Scientific Center<br>86 Entuziastov shosse<br>Moscow, Moskva, 111123<br>Russia     | Hospital or Medical Center | Russia      | 3475-240-0482       | SBHI Moscow Clinical Scientific Center<br>86 Entuziastov shosse<br>Moscow, Moskva 111123<br>Russia                                                                                                           | 04-Jul-2016                  | Not available                                                                       |

|                                                                                                                                                                                                  |                            |        |               |                                                                                                                                                             |             |               |
|--------------------------------------------------------------------------------------------------------------------------------------------------------------------------------------------------|----------------------------|--------|---------------|-------------------------------------------------------------------------------------------------------------------------------------------------------------|-------------|---------------|
| Vladimir Mikhaylovich Moiseyenko<br>SPb CRC of specialized types of medical care (Oncology)<br>68A Leningradskaya st. settlement Pesochny<br>Saint-Petersburg, Sankt-Peterburg, 197758<br>Russia | Hospital or Medical Center | Russia | 3475-240-0483 | SPb CRC of specialized types of medical care (Oncology)<br>68A Leningradskaya st. settlement Pesochny<br>Saint-Petersburg, Sankt-Peterburg 197758<br>Russia | 17-Jun-2016 | Not available |
| Georgy Moiseevich Manikhas<br>SPb SBHI City Clinical Oncological Dispensary<br>56 prospekt Veteranov<br>Saint Petersburg, Sankt-Peterburg, 198255<br>Russia                                      | Hospital or Medical Center | Russia | 3475-240-0485 | SPb SBHI City Clinical Oncological Dispensary<br>56 prospekt Veteranov<br>Saint Petersburg, Sankt-Peterburg 198255<br>Russia                                | 05-Jul-2016 | Not available |

| <b>Primary Investigator/Facility Address*</b>                                                                                                                                 | <b>Facility Description</b> | <b>Country</b> | <b>Protocol # - Site #</b> | <b>IEC Name and Address**</b>                                                                                                   | <b>Date of Initial IRB Approval</b> | <b>Initial IRB approval number</b> |
|-------------------------------------------------------------------------------------------------------------------------------------------------------------------------------|-----------------------------|----------------|----------------------------|---------------------------------------------------------------------------------------------------------------------------------|-------------------------------------|------------------------------------|
| Vladimir Anatolyevich Kostorov<br>Leningrad Regional Oncology Center<br>2 Zaozernaya Street<br>Saint-Petersburg, Sankt-Peterburg, 188663<br>Russia                            | Hospital or Medical Center  | Russia         | 3475-240-0490              | Leningrad Regional Oncology Center<br>37-39 Liteiny prospekt<br>Saint-Petersburg, Sankt-Peterburg 191014<br>Russia              | 17-Nov-2016                         | Not available                      |
| Foat Shaykhutdinovitch Akhmetzyanov, M.D.<br>Republican Clinical Oncology Dispensary of Tatarstan MoH<br>31 Sibirskiy trakt<br>Kazan, Tatarstan, Respublika, 420029<br>Russia | Hospital or Medical Center  | Russia         | 3475-240-0491              | LEC of Tatarstan Republican Clinical Oncology Dispensary<br>29 Sibirskiy trakt<br>Kazan, Tatarstan, Respublika 420029<br>Russia | 09-Dec-2016                         | Not available                      |
| Ho Yeong Lim<br>Samsung Medical Center<br>81 Irwon Ro Gangnam Gu<br>Seoul, Seoul, 06351<br>South Korea                                                                        | Hospital or Medical Center  | South Korea    | 3475-240-0501              | Samsung Medical Center IRB/IEC<br>81 Irwon Ro Gangnam Gu<br>Seoul, Seoul 06351<br>South Korea                                   | 25-May-2016                         | SMC 2016-05-008                    |

|                                                                                                                                                                                                              |                                        |                    |                      |                                                                                                                                       |                    |                           |
|--------------------------------------------------------------------------------------------------------------------------------------------------------------------------------------------------------------|----------------------------------------|--------------------|----------------------|---------------------------------------------------------------------------------------------------------------------------------------|--------------------|---------------------------|
| <p>Baek-Yeol Ryoo<br/> Asan Medical Center<br/> 88 Olympic-ro 43-gil Songpa-gu<br/> B1 Study coordinator room<br/> located in Life science research<br/> insti<br/> Seoul, Seoul, 05505<br/> South Korea</p> | <p>Hospital or<br/> Medical Center</p> | <p>South Korea</p> | <p>3475-240-0502</p> | <p>Institutional Review Board Asan Medical<br/> Center<br/> 88 Olympicro 43 gil SongpaGu<br/> Seoul, Seoul 05505<br/> South Korea</p> | <p>20-Jun-2016</p> | <p>2016-0679</p>          |
| <p>Myung Ah Lee<br/> The Catholic University of Korea.<br/> Seoul St. Mary s Hospital<br/> 222 Banpo daero Seocho gu<br/> Seoul, Seoul, 06591<br/> South Korea</p>                                           | <p>Hospital or<br/> Medical Center</p> | <p>South Korea</p> | <p>3475-240-0503</p> | <p>The Catholic University of Korea IRB<br/> 222 Banpo daero Seocho gu<br/> Seoul, Seoul 06591<br/> South Korea</p>                   | <p>10-Jun-2016</p> | <p>KC16MDGT0<br/> 349</p> |

| Primary Investigator/Facility Address*                                                                                  | Facility Description          | Country     | Protocol # - Site # | IEC Name and Address**                                                                                                                                                                    | Date of Initial IRB Approval | Initial IRB approval number |
|-------------------------------------------------------------------------------------------------------------------------|-------------------------------|-------------|---------------------|-------------------------------------------------------------------------------------------------------------------------------------------------------------------------------------------|------------------------------|-----------------------------|
| Yeul Hong Kim<br>Korea University Anam Hospital<br>73, Incheon-Ro, Seongbuk-Gu<br>Seoul, Seoul, 02841<br>South Korea    | Hospital or<br>Medical Center | South Korea | 3475-240-0504       | Korea University Anam Hospital IRB<br>73 Incheon ro, Seongbuk gu<br>5F Clinical Trial Center<br>Seoul, Seoul 02841<br>South Korea                                                         | 02-May-2016                  | ED16054                     |
| Kyung-Hun Lee<br>Seoul National University<br>Hospital<br>101Daehak-ro Jongno-gu.<br>Seoul, Seoul, 03080<br>South Korea | Hospital or<br>Medical Center | South Korea | 3475-240-0505       | Institutional Review Board Seoul National<br>University Hospital<br>101 Daehak-ro. Jongno-gu.<br>Seoul, Seoul 03080<br>South Korea                                                        | 31-Oct-2016                  | H-1609-121-<br>795          |
| Hye Jin Choi<br>Severance Hospital Yonsei<br>University Health System                                                   | Hospital or<br>Medical Center | South Korea | 3475-240-0506       | Yonsei University Health System, Severance<br>Hospital IRB<br>50-1 Yonsei-ro. Seodaemun gu<br>Study coordinator room 15A Ward 1F<br>Chejung building<br>Seoul, Seoul 03722<br>South Korea | 18-Nov-2016                  | 4-2016-0875                 |



|                                                                                                                                                                      |                                       |               |                      |                                                                                                                                                                                                                                                                                                      |                    |                           |
|----------------------------------------------------------------------------------------------------------------------------------------------------------------------|---------------------------------------|---------------|----------------------|------------------------------------------------------------------------------------------------------------------------------------------------------------------------------------------------------------------------------------------------------------------------------------------------------|--------------------|---------------------------|
| <p>Ann-Lii Cheng<br/>National Taiwan University<br/>Hospital<br/>No. 7 Chung-Shan South Road<br/>Department of Oncology<br/>Taipei, Taipei, 10002<br/>Taiwan</p>     | <p>Hospital or<br/>Medical Center</p> | <p>Taiwan</p> | <p>3475-240-0601</p> | <p>National Taiwan University Hospital. Ethics<br/>Review Committee B<br/>No.7, Chung Shan S. Rd., Zhongzheng Dist.<br/>Taipei, Taipei 10002<br/>Taiwan<br/>National Taiwan University Hospital -<br/>Research Ethics Committee<br/>No. 7 Chung-Shan South Rd.<br/>Taipei, Taipei 100<br/>Taiwan</p> | <p>28-Apr-2016</p> | <p>201603051M<br/>SD</p>  |
| <p>Yee Chao<br/>Taipei Veterans General Hospital<br/>No.201 Shih-Pai Rd. Sec. 2<br/>B1 Cancer Center Chung-Cheng<br/>Building<br/>Taipei, Taipei, 112<br/>Taiwan</p> | <p>Hospital or<br/>Medical Center</p> | <p>Taiwan</p> | <p>3475-240-0602</p> | <p>Taipei Veterans General Hospital Ethics<br/>Review Committee<br/>No. 201, Sec. 2, Shihpai Rd.<br/>Taipei, Taipei 112<br/>Taiwan<br/>Taipei Veterans General Hospital<br/>Institutional Review Board 2<br/>No. 201 Sec. 2 Shih-Pai Road<br/>Taipei, Taipei 112<br/>Taiwan</p>                      | <p>29-Jun-2016</p> | <p>2016-06-<br/>002CU</p> |

| Primary Investigator/Facility Address*                                                                                                                                                                              | Facility Description          | Country | Protocol # - Site # | IEC Name and Address**                                                                                                                                     | Date of Initial IRB Approval | Initial IRB approval number |
|---------------------------------------------------------------------------------------------------------------------------------------------------------------------------------------------------------------------|-------------------------------|---------|---------------------|------------------------------------------------------------------------------------------------------------------------------------------------------------|------------------------------|-----------------------------|
| Shi-Ming Lin<br>Chang Gung Medical Foundation.<br>Linkou<br>No.5 Fuxing St Guishan Dist.<br>6J Dept. of Hepatology<br>Taoyuan, Taoyuan, 333<br>Taiwan                                                               | Hospital or<br>Medical Center | Taiwan  | 3475-240-0603       | CHANG GUNG MEDICAL FOUNDATION<br>INSTITUTIONAL REVIEW BOARD<br>No. 123, Dung-Hou Rd, Jiou-Lu Tsuen,<br>Kwei-Shan Hsiang,<br>Taoyuan, Taoyuan 333<br>Taiwan | 20-Jun-2016                  | 201600624A<br>4             |
| Kun Ming Rau/Yen-Hao Chen<br>Chang Gung Med Foundation.<br>Kaohsiung Branch<br>N 123 Ta-Pei Road Niao-Song<br>Dist.<br>Dpt of Oncology. Blood smear<br>room 7F Medical Bd.<br>Kaohsiung, Kaohsiung, 83301<br>Taiwan | Hospital or<br>Medical Center | Taiwan  | 3475-240-0604       | CHANG GUNG MEDICAL FOUNDATION<br>INSTITUTIONAL REVIEW BOARD<br>No. 123, Dung-Hou Rd, Jiou-Lu Tsuen,<br>Kwei-Shan Hsiang,<br>Taoyuan, Taoyuan 333<br>Taiwan | 20-Jun-2016                  | 201600624A<br>4             |
| Chang-Fang Chiu<br>China Medical University<br>Hospital<br>No.2 Yuh-Der Road<br>Liver Unit.2nd FL.B Building<br>Taichung, Taichung, 40447<br>Taiwan                                                                 | Hospital or<br>Medical Center | Taiwan  | 3475-240-0605       | China Medical University Hospital Research<br>Ethics Committee<br>No 2 Yuh-Der Road<br>Taichung, Taichung 404<br>Taiwan                                    | 20-Aug-2016                  | CMUH105-<br>REC1-102        |

|                                                                                                                                                                                         |                               |          |               |                                                                                                                                                                                      |             |                  |
|-----------------------------------------------------------------------------------------------------------------------------------------------------------------------------------------|-------------------------------|----------|---------------|--------------------------------------------------------------------------------------------------------------------------------------------------------------------------------------|-------------|------------------|
| Chien-Hung Chen<br>National Taiwan University<br>Hospital Yun-Lin Branch<br>No.579 Sec 2 Yunlin Rd. Douliou<br>City<br>Yunlin County, Yunlin, 640<br>Taiwan                             | Hospital or<br>Medical Center | Taiwan   | 3475-240-0606 | National Taiwan University Hospital -<br>Research Ethics Committee<br>No. 7 Chung-Shan South Rd.<br>Taipei, Taipei 100<br>Taiwan                                                     | 05-Sep-2016 | 201608029M<br>SD |
| Naiyarat Prasongsook,M.D.<br>Phramongkutklo Hospital<br>315 Ratchawithi Rd.<br>Div of Med Onco.<br>Chalermphrakiat bldg 4th Fl<br>Bangkok, Krung Thep Maha<br>Nakhon, 10400<br>Thailand | Hospital or<br>Medical Center | Thailand | 3475-240-0622 | Institutional Review Board Royal Thai Army<br>MedicalDepartment<br>315 Rajvithi Rd.<br>Phamongkutklowwechwittaya Bldg., 5th Fl.<br>Bangkok, Krung Thep Maha Nakhon 10400<br>Thailand | 02-Mar-2017 | P014h/59         |

| Primary Investigator/Facility Address*                                                                                                                                | Facility Description       | Country  | Protocol # - Site # | IEC Name and Address**                                                                                                                                                                                          | Date of Initial IRB Approval | Initial IRB approval number                           |
|-----------------------------------------------------------------------------------------------------------------------------------------------------------------------|----------------------------|----------|---------------------|-----------------------------------------------------------------------------------------------------------------------------------------------------------------------------------------------------------------|------------------------------|-------------------------------------------------------|
| Suebpong Tanasanvimon,M.D.<br>Chulalongkorn Hospital<br>1873 Rama 4 Rd.<br>Pathumwan<br>Bangkok, Krung Thep Maha Nakhon, 10330<br>Thailand                            | Hospital or Medical Center | Thailand | 3475-240-0623       | Institutional Review Board, Faculty of Medicine, Chulalongkorn Univ.<br>1873 Rama 4 Rd.<br>Pathumwan<br>Bangkok, Krung Thep Maha Nakhon 10330<br>Thailand                                                       | 17-Nov-2016                  | 514/59                                                |
| Touch Ativitavas,M.D.<br>Ramathibodi Hospital.<br>270 Rama VI Rd<br>6th Fl. Rm 619 Queen Sirikit Medical Center<br>Bangkok, Krung Thep Maha Nakhon, 10400<br>Thailand | Hospital or Medical Center | Thailand | 3475-240-0624       | Committee on Human Rights Related to Res. Involving Human Subjects<br>270 Rama VI Rd, Ratchathewi<br>Faculty of Medicine, Ramathibodi Hosp., Mahidol Univ.<br>Bangkok, Krung Thep Maha Nakhon 10400<br>Thailand | 08-Aug-2016                  | Protocol #: ID 07-59-29 Internal Order: IO R3105953 8 |

|                                                                                                                                                                                                                                                       |                            |          |               |                                                                                                                                                                                  |             |                |
|-------------------------------------------------------------------------------------------------------------------------------------------------------------------------------------------------------------------------------------------------------|----------------------------|----------|---------------|----------------------------------------------------------------------------------------------------------------------------------------------------------------------------------|-------------|----------------|
| Vichien Srimuninnimit,M.D./Krittiya Korphaisarn,M.D.<br>Faculty of Medicine Siriraj Hospital<br>2 Wang Lang Rd. Bangkoknoi<br>13 Fl. Chalmphrakiat Bldg.Div. of Med. Oncol. Faculty of Medicine<br>Bangkok, Krung Thep Maha Nakhon, 10700<br>Thailand | Hospital or Medical Center | Thailand | 3475-240-0625 | Siriraj Institutional Review Board<br>2 Prannok Rd<br>Office of Siriraj Inst. Review Board. SiMR Building. 2nd Fl Rm 210<br>Bangkok, Krung Thep Maha Nakhon 10700<br>Thailand    | 22-Jul-2016 | 320/2559(E C1) |
| Arunee Dechaphunkul<br>Songklanagarind Hospital<br>15 Kanjanavanich Road<br>Div of Medical Oncology. 5thFl. Sutikam Bldg<br>Hat-Yai, Songkhla, 90110<br>Thailand                                                                                      | Hospital or Medical Center | Thailand | 3475-240-0626 | Ethics Committee of Faculty of Medicine, Prince of Songkla U<br>15 Karnjanavanit Road<br>Faculty of Medicine Prince of Songkla University<br>Hat Yai, Songkhla 90110<br>Thailand | 19-Oct-2016 | 59-230-14-1    |

| Primary Investigator/Facility Address*                                                                                                                                                                             | Facility Description       | Country  | Protocol # - Site # | IEC Name and Address**                                                                                                                                                                                                                                                                                     | Date of Initial IRB Approval | Initial IRB approval number |
|--------------------------------------------------------------------------------------------------------------------------------------------------------------------------------------------------------------------|----------------------------|----------|---------------------|------------------------------------------------------------------------------------------------------------------------------------------------------------------------------------------------------------------------------------------------------------------------------------------------------------|------------------------------|-----------------------------|
| Busyamas Chewaskulyong,M.D.<br>Maharaj Nakorn Chiangmai Hospital<br>11th Floor, Sripat Building<br>Div. Medical Oncology. Depart. Internal Medicine. Faculty of Medicine<br>Chiang Mai, Chiang Mai, 50200 Thailand | Hospital or Medical Center | Thailand | 3475-240-0627       | Research Ethics Committee, Faculty of Medicine, Chiang Mai U<br>110 Intavaroros Road<br>Chiang Mai, Chiang Mai 50200 Thailand                                                                                                                                                                              | 31-Aug-2016                  | MED-2559-04016              |
| Irfan Cicin<br>Trakya Uni. Tip Fakultesi<br>Trakya UTF Onkoloji Bilim Dali<br>Balkan Yerleskesi<br>Edirne, Edirne, 22030 Turkey                                                                                    | Hospital or Medical Center | Turkey   | 3475-240-0641       | Bezmi Alem Vakif University Ethics Committee<br>Bezmi Alem Vakif Uni.<br>Vatan Cad. Fatih<br>Istanbul, Istanbul 34093 Turkey<br>Edirne Klinik Arastirmalar Ethics Committee<br>IRB/IEC<br>Trakya Universitesi Balkan Yerleskesi Tip Fakultesi<br>Temel Bilimler Blogu Kat 3<br>Edirne, Edirne 22030 Turkey | 05-OCT-2016                  | Karar No: 13/01             |

|                                                                                                                                                                                      |                               |        |               |                                                                                                                                                                                                                                                                                                                    |             |                    |
|--------------------------------------------------------------------------------------------------------------------------------------------------------------------------------------|-------------------------------|--------|---------------|--------------------------------------------------------------------------------------------------------------------------------------------------------------------------------------------------------------------------------------------------------------------------------------------------------------------|-------------|--------------------|
| Ahmet Taner Sumbul,DR.<br>Basken Adana Dr.Turgut Noyan<br>Uygulama ve Arastirma Merkezi<br>No.37A Yuregir<br>Kazim Karabekir Mah. Guelhatmi<br>Cad.<br>Adana, Adana, 01120<br>Turkey | Hospital or<br>Medical Center | Turkey | 3475-240-0644 | Bezmalem Vakif University Ethics<br>Committee<br>Bezmalem Vakif Uni.<br>Vatan Cad. Fatih<br>Istanbul, Istanbul 34093<br>Turkey<br>Edirne Klinik Arastirmalar Ethics Committee<br>IRB/IEC<br>Trakya Universitesi Balkan Yerleskesi Tip<br>Fakultesi<br>Temel Bilimler Blogu Kat 3<br>Edirne, Edirne 22030<br>Turkey | 05-OCT-2016 | Karar No:<br>13/01 |
|--------------------------------------------------------------------------------------------------------------------------------------------------------------------------------------|-------------------------------|--------|---------------|--------------------------------------------------------------------------------------------------------------------------------------------------------------------------------------------------------------------------------------------------------------------------------------------------------------------|-------------|--------------------|

| Primary Investigator/Facility Address*                                                                                                                                      | Facility Description       | Country | Protocol # - Site # | IEC Name and Address**                                                                                                                                                                                                                                                                                         | Date of Initial IRB Approval | Initial IRB approval number |
|-----------------------------------------------------------------------------------------------------------------------------------------------------------------------------|----------------------------|---------|---------------------|----------------------------------------------------------------------------------------------------------------------------------------------------------------------------------------------------------------------------------------------------------------------------------------------------------------|------------------------------|-----------------------------|
| Hakan Harputluoglu<br>Inonu University Faculty of Medicine<br>Inonu UTF Turgut Ozal Tip Merkezi Elazig Yolu 15. km.<br>Onkoloji Bolumu<br>Malatya, Malatya, 44280<br>Turkey | Hospital or Medical Center | Turkey  | 3475-240-0645       | Bezmialem Vakif University Ethics Committee<br>Bezmialem Vakif Uni.<br>Vatan Cad. Fatih<br>Istanbul, Istanbul 34093<br>Turkey<br>Edirne Klinik Arastirmalar Ethics Committee<br>IRB/IEC<br>Trakya Universitesi Balkan Yerleskesi Tip Fakultesi<br>Temel Bilimler Blogu Kat 3<br>Edirne, Edirne 22030<br>Turkey | 05-OCT-2016                  | Karar No:<br>13/01          |
| Erdem Goker<br>Ege Universitesi Tip Fakultesi<br>Bornova<br>Oncology Department<br>Izmir, Izmir, 35100<br>Turkey                                                            | Hospital or Medical Center | Turkey  | 3475-240-0648       | Bezmialem Vakif University Ethics Committee<br>Bezmialem Vakif Uni.<br>Vatan Cad. Fatih<br>Istanbul, Istanbul 34093<br>Turkey<br>Edirne Klinik Arastirmalar Ethics Committee<br>IRB/IEC<br>Trakya Universitesi Balkan Yerleskesi Tip Fakultesi<br>Temel Bilimler Blogu Kat 3<br>Edirne, Edirne 22030<br>Turkey | 05-OCT-2016                  | Karar No:<br>13/01          |



|                                                                                                                                                                                                   |                               |        |               |                                                                                                                                                                                                                                                                                                                      |             |                    |
|---------------------------------------------------------------------------------------------------------------------------------------------------------------------------------------------------|-------------------------------|--------|---------------|----------------------------------------------------------------------------------------------------------------------------------------------------------------------------------------------------------------------------------------------------------------------------------------------------------------------|-------------|--------------------|
| Mesut Seker<br>Bezmialem Vakif Univ. Tıp<br>Fakultesi Hastanesi Tıbbi Onkoloji<br>Bolumu<br>Adnan Menderes Bulvari. Vatan<br>Cad<br>Onkoloji Bolumu. Fatih<br>Istanbul, Istanbul, 34093<br>Turkey | Hospital or<br>Medical Center | Turkey | 3475-240-0649 | Bezmialem Vakif University Ethics<br>Committee<br>Bezmialem Vakif Uni.<br>Vatan Cad. Fatih<br>Istanbul, Istanbul 34093<br>Turkey<br>Edirne Klinik Arastirmalar Ethics Committee<br>IRB/IEC<br>Trakya Universitesi Balkan Yerleskesi Tip<br>Fakultesi<br>Temel Bilimler Blogu Kat 3<br>Edirne, Edirne 22030<br>Turkey | 05-OCT-2016 | Karar No:<br>13/01 |
|---------------------------------------------------------------------------------------------------------------------------------------------------------------------------------------------------|-------------------------------|--------|---------------|----------------------------------------------------------------------------------------------------------------------------------------------------------------------------------------------------------------------------------------------------------------------------------------------------------------------|-------------|--------------------|

| Primary Investigator/Facility Address*                                                                                                                                               | Facility Description       | Country | Protocol # - Site # | IEC Name and Address**                                                                                                                                                                                                                                                                                         | Date of Initial IRB Approval | Initial IRB approval number |
|--------------------------------------------------------------------------------------------------------------------------------------------------------------------------------------|----------------------------|---------|---------------------|----------------------------------------------------------------------------------------------------------------------------------------------------------------------------------------------------------------------------------------------------------------------------------------------------------------|------------------------------|-----------------------------|
| Sezer Saglam<br>Gayrettepe Florence Nightingale Hospital<br>Cemil Aslan Guder Sokak No 8<br>Gayrettepe<br>Istanbul, Istanbul, 34349<br>Turkey                                        | Hospital or Medical Center | Turkey  | 3475-240-0650       | Bezmialem Vakif University Ethics Committee<br>Bezmialem Vakif Uni.<br>Vatan Cad. Fatih<br>Istanbul, Istanbul 34093<br>Turkey<br>Edirne Klinik Arastirmalar Ethics Committee<br>IRB/IEC<br>Trakya Universitesi Balkan Yerleskesi Tip Fakultesi<br>Temel Bilimler Blogu Kat 3<br>Edirne, Edirne 22030<br>Turkey | 05-OCT-2016                  | Karar No:<br>13/01          |
| Devrim Cabuk<br>Kocaeli Universitesi Tip Fakultesi<br>Umuttepe Yerleskesi<br>Kocaeli Univ. Tip Fakultesi Ic Hastaliklari ABD. Tibbi Onkoloji BD<br>Kocaeli, Kocaeli, 41380<br>Turkey | Hospital or Medical Center | Turkey  | 3475-240-0651       | Bezmialem Vakif University Ethics Committee<br>Bezmialem Vakif Uni.<br>Vatan Cad. Fatih<br>Istanbul, Istanbul 34093<br>Turkey<br>Edirne Klinik Arastirmalar Ethics Committee<br>IRB/IEC<br>Trakya Universitesi Balkan Yerleskesi Tip Fakultesi<br>Temel Bilimler Blogu Kat 3<br>Edirne, Edirne 22030<br>Turkey | 05-OCT-2016                  | Karar No:<br>13/01          |

|                                                                                                                                                       |                               |    |               |                                                                                                                                     |             |            |
|-------------------------------------------------------------------------------------------------------------------------------------------------------|-------------------------------|----|---------------|-------------------------------------------------------------------------------------------------------------------------------------|-------------|------------|
| Debashis Sarker<br>1Kings College Hospital<br>Denmark Hill<br>Institute of Liver Studies. 3rd<br>Floor- Cheyne Wing<br>London, Lambeth, SE5 9RS<br>UK | Hospital or<br>Medical Center | UK | 3475-240-0661 | NRES Committee London - Chelsea<br>80 London Road<br>Skipton House. Ground Floor. NRES/HRA<br>London, London, City of SE1 6LH<br>UK | 14-OCT-2016 | 16/LO/1514 |
| Daniel Palmer<br>Clatterbridge Oncology Centre<br>Brownlow Hill<br>Liverpool, Liverpool, L69 3GA<br>UK                                                | Hospital or<br>Medical Center | UK | 3475-240-0662 | NRES Committee London - Chelsea<br>80 London Road<br>Skipton House. Ground Floor. NRES/HRA<br>London, London, City of SE1 6LH<br>UK | 14-OCT-2016 | 16/LO/1514 |

| Primary Investigator/Facility Address*                                                                                                                                 | Facility Description          | Country | Protocol # - Site # | IEC Name and Address**                                                                                                              | Date of Initial IRB Approval | Initial IRB approval number |
|------------------------------------------------------------------------------------------------------------------------------------------------------------------------|-------------------------------|---------|---------------------|-------------------------------------------------------------------------------------------------------------------------------------|------------------------------|-----------------------------|
| Pankaj Punia<br>University Hospitals Birmingham<br>NHS Foundation Trust<br>Mindelsohn Way..<br>Cancer Centre<br>Birmingham, Birmingham, B15<br>2GW<br>UK               | Hospital or<br>Medical Center | UK      | 3475-240-0663       | NRES Committee London - Chelsea<br>80 London Road<br>Skipton House. Ground Floor. NRES/HRA<br>London, London, City of SE1 6LH<br>UK | 14-OCT-2016                  | 16/LO/1514                  |
| Rohini Sharma<br>Imperial College London<br>Du Cane Road<br>Hammersmith Hospital Campus<br>London, London, City of, WC12<br>0NN<br>UK                                  | Hospital or<br>Medical Center | UK      | 3475-240-0664       | NRES Committee London - Chelsea<br>80 London Road<br>Skipton House. Ground Floor. NRES/HRA<br>London, London, City of SE1 6LH<br>UK | 14-OCT-2016                  | 16/LO/1514                  |
| Syed Zubair<br>The James Cook University<br>Hospital<br>Marton Road<br>South Tees Hospitals NHS<br>Foundation Trust<br>Middlesbrough, United Kingdom,<br>TS4 3BW<br>UK | Hospital or<br>Medical Center | UK      | 3475-240-0665       | NRES Committee London - Chelsea<br>80 London Road<br>Skipton House. Ground Floor. NRES/HRA<br>London, London, City of SE1 6LH<br>UK | 14-OCT-2016                  | 16/LO/1514                  |

|                                                                                                                               |                                   |     |               |                                                                                                                                                                              |             |           |
|-------------------------------------------------------------------------------------------------------------------------------|-----------------------------------|-----|---------------|------------------------------------------------------------------------------------------------------------------------------------------------------------------------------|-------------|-----------|
| Richard Finn<br>UCLA Hematology/Oncology –<br>Santa Monica<br>10945 Le Conte Ave, Suite 3360<br>Los Angeles, CA, 90095<br>USA | Non Hospital<br>Clinical Practice | USA | 3475-240-0682 | UCLA Office of Human Research Protection<br>Program<br>11000 Kinross Avenue, Suite 211<br>Office of the Human Research Protection<br>Program<br>Los Angeles, CA 90095<br>USA | 26-Jul-2016 | 16-000664 |
| Mark Karwal<br>University of Iowa Hospital and<br>Clinics<br>200 Hawkins Drive 5977 JPP<br>Iowa City, IA, 52242<br>USA        | Hospital or<br>Medical Center     | USA | 3475-240-0684 | University of Iowa Human Subjects Office<br>600 Newton Rd<br>University of Iowa Human Subjects Office,<br>Office of the VP for Research<br>Iowa City, IA 52242<br>USA        | 31-May-2017 | 201703843 |

| <b>Primary Investigator/Facility Address*</b>                                                                                                                                     | <b>Facility Description</b>   | <b>Country</b> | <b>Protocol # - Site #</b> | <b>IEC Name and Address**</b>                                                                                                        | <b>Date of Initial IRB Approval</b> | <b>Initial IRB approval number</b> |
|-----------------------------------------------------------------------------------------------------------------------------------------------------------------------------------|-------------------------------|----------------|----------------------------|--------------------------------------------------------------------------------------------------------------------------------------|-------------------------------------|------------------------------------|
| Ahmed Kaseb,M.D.<br>MD Anderson<br>1515 Holcombe Blvd., Unit # 426<br>FC10.3064<br>Houston, TX, 77030<br>USA                                                                      | Hospital or<br>Medical Center | USA            | 3475-240-0685              | University of Texas MD Anderson Cancer<br>Center IRB<br>7007 Bertner Avenue<br>Unit 1637<br>Houston, TX 77030<br>USA                 | 21-Jun-2017                         | 2016-0786                          |
| Arturo Loaiza-Bonilla/Nevena<br>Damjanov<br>Abramson Cancer Center of the<br>University of Pennsylvania<br>51 N. 39th. Street<br>MAB Suite 103A<br>Philadelphia, PA, 19104<br>USA | Hospital or<br>Medical Center | USA            | 3475-240-0686              | Office of Regulatory Affairs<br>133 South 36th Street Mezzanine Level<br>Philadelphia, PA 19104-3246<br>USA                          | 28-Jun-2016                         | 825044                             |
| Gina Vaccaro<br>Oregon Health and Science<br>University<br>3181 Southwest Sam Jackson<br>Park Road<br>Portland, OR, 97239<br>USA                                                  | Hospital or<br>Medical Center | USA            | 3475-240-0687              | Oregon Health & Science IRB<br>3181 SW Sam Jackson Park Road L106 RI<br>Institutional Review Board<br>Portland, OR 97239-3098<br>USA | 01-Sep-2016                         | STUDY0001<br>6133                  |

|                                                                                                                          |                               |     |               |                                                                                                                                                                                        |             |                                                                                             |
|--------------------------------------------------------------------------------------------------------------------------|-------------------------------|-----|---------------|----------------------------------------------------------------------------------------------------------------------------------------------------------------------------------------|-------------|---------------------------------------------------------------------------------------------|
| Jared Acoba,M.D.<br>The Queen's Medical Center<br>701 Ilalo St.<br>Honolulu, HI, 96813<br>USA                            | Hospital or<br>Medical Center | USA | 3475-240-0693 | Western Institutional Review Board<br>1019 39th Avenue SE<br>Suite 120<br>Puyallup, WA 98374<br>USA                                                                                    | 06-Oct-2016 | Study Num:<br>1168902<br>WIRB PRO<br>NUM:<br>20162258<br>ONLINE<br>TRACKING: 11-<br>1864777 |
| Jennifer F. Carney<br>Kaiser Permanente - Moanalua<br>Medical Center<br>3288 Moanalua Road<br>Honolulu, HI, 96813<br>USA | Hospital or<br>Medical Center | USA | 3475-240-0694 | Kaiser Permanente Administrative Offices<br>393 E. Walnut<br>IRB<br>Pasadena, CA 91188<br>USA<br>Kaiser Permanente IRB<br>711 Kapiolani Blvd<br>Suite 110<br>Honolulu, HI 96813<br>USA | 18-May-2016 | Pro0000654<br>9                                                                             |

| <b>Primary Investigator/Facility Address*</b>                                                                                                   | <b>Facility Description</b> | <b>Country</b> | <b>Protocol # - Site #</b> | <b>IEC Name and Address**</b>                                                                                                                     | <b>Date of Initial IRB Approval</b> | <b>Initial IRB approval number</b>                                                         |
|-------------------------------------------------------------------------------------------------------------------------------------------------|-----------------------------|----------------|----------------------------|---------------------------------------------------------------------------------------------------------------------------------------------------|-------------------------------------|--------------------------------------------------------------------------------------------|
| Jyotsna Fuloria,M.D./Robert Ramirez<br>Ochsner Clinic Foundation<br>1514 Jefferson Highway<br>New Orleans, LA, 70121<br>USA                     | Hospital or Medical Center  | USA            | 3475-240-0696              | Ochsner Clinic Foundation IRB<br>1554 Jefferson Hwy<br>New Orleans, LA 70121<br>USA                                                               | 26-May-2016                         | 2016.104.C                                                                                 |
| Renuka Iyer,M.D.<br>Roswell Park Cancer Institute<br>Elm and Carlton Streets<br>Roswell Cancer Institute<br>Buffalo, NY, 14263<br>USA           | Hospital or Medical Center  | USA            | 3475-240-0698              | Roswell Park Cancer Institute<br>Elm and Carlton Streets<br>Roswell Park Cancer Institute IRB<br>Buffalo, NY 14263<br>USA                         | 20-Sep-2016                         | STUDY00000<br>036                                                                          |
| Weijing Sun,M.D./James J Lee<br>UPMC Cancer Center/Hillman<br>Cancer Center<br>5150 Centre Avenue,<br>5th Floor<br>Pittsburgh, PA, 15232<br>USA | Hospital or Medical Center  | USA            | 3475-240-0701              | Western Institutional Review Board<br>1019 39th Avenue SE<br>Suite 120<br>Puyallup, WA 98374<br>USA                                               | 08-Aug-2016                         | Study Num:<br>1167403<br>WIRB PRO<br>NUM:<br>20160210<br>ONLINE<br>TRACKING: 11-<br>358778 |
| Andrew Xiuxuan Zhu<br>Massachusetts General Hospital<br>55 Fruit St.<br>Yawkey Building<br>Boston, MA, 02114<br>USA                             | Hospital or Medical Center  | USA            | 3475-240-0702              | Dana Farber Cancer Institute Institutional<br>Review Board<br>450 Brookline Ave.<br>OS229 Dana-Farber Cancer Institute<br>Boston, MA 02215<br>USA | 01-May-2017                         | 17-172                                                                                     |



|                                                                                                                                          |                                            |            |                      |                                                                                                                                                                                                              |                    |                                                                                                                 |
|------------------------------------------------------------------------------------------------------------------------------------------|--------------------------------------------|------------|----------------------|--------------------------------------------------------------------------------------------------------------------------------------------------------------------------------------------------------------|--------------------|-----------------------------------------------------------------------------------------------------------------|
| <p>Ari Baron<br/> Pacific Hematology Oncology<br/> Associates<br/> 2100 Webster St , Ste. 225<br/> San Francisco, CA, 94115<br/> USA</p> | <p>Non Hospital<br/> Clinical Practice</p> | <p>USA</p> | <p>3475-240-0704</p> | <p>Western IRB<br/> 1019 39th Avenue SE<br/> Suite 120<br/> Puyallup, WA 98374<br/> USA<br/> Western Institutional Review Board<br/> 1019 39th Avenue SE<br/> Suite 120<br/> Puyallup, WA 98374<br/> USA</p> | <p>18-Jul-2016</p> | <p>Study Num:<br/> 1166592<br/> WIRB PRO<br/> NUM:<br/> 20160210<br/> ONLINE<br/> TRACKING: 11-<br/> 358778</p> |
|------------------------------------------------------------------------------------------------------------------------------------------|--------------------------------------------|------------|----------------------|--------------------------------------------------------------------------------------------------------------------------------------------------------------------------------------------------------------|--------------------|-----------------------------------------------------------------------------------------------------------------|

| Primary Investigator/Facility Address*                                                                                                                        | Facility Description       | Country | Protocol # - Site # | IEC Name and Address**                                                                                                                                                                                       | Date of Initial IRB Approval | Initial IRB approval number                                                                |
|---------------------------------------------------------------------------------------------------------------------------------------------------------------|----------------------------|---------|---------------------|--------------------------------------------------------------------------------------------------------------------------------------------------------------------------------------------------------------|------------------------------|--------------------------------------------------------------------------------------------|
| Daneng Li<br>City of Hope Comprehensive Cancer Center<br>1500 East Duarte Road<br>Duarte, CA, 91010<br>USA                                                    | Hospital or Medical Center | USA     | 3475-240-0705       | Western IRB<br>1019 39th Avenue SE<br>Suite 120<br>Puyallup, WA 98374<br>USA                                                                                                                                 | 20-Apr-2016                  | Study Num:<br>1164426<br>WIRB PRO<br>NUM:<br>20160210<br>ONLINE<br>TRACKING: 11-<br>358778 |
| Andreas Kaubisch<br>Montefiore Medical Center-<br>Albert Einstein College of<br>Medicine<br>111 East 210th Street Hofheimer<br>100<br>Bronx, NY, 10467<br>USA | Hospital or Medical Center | USA     | 3475-240-0706       | Biomedical Research Alliance of New York<br>1981 Marcus Avenue<br>Lake Success, NY 11042<br>USA<br>Biomedical Research Alliance of New York<br>1983 Marcus Avenue Suite 210<br>Lake Success, NY 11042<br>USA | 12-Jan-2017                  | 16-06-215-01                                                                               |
| Kirk Edward Heyne, M.D.<br>Houston Methodist Cancer<br>Center<br>6445 Main St., OPC 24<br>Houston, TX, 77030<br>USA                                           | Hospital or Medical Center | USA     | 3475-240-0707       | The Methodist Hospital Research Institute<br>IRB<br>6670 Bertner Houston,<br>MS: R2-216<br>Houston, TX 77030<br>USA                                                                                          | 07-Jun-2017                  | Pro00016433                                                                                |

|                                                                                                                                         |                               |     |               |                                                                                                                                                             |             |                                                                                   |
|-----------------------------------------------------------------------------------------------------------------------------------------|-------------------------------|-----|---------------|-------------------------------------------------------------------------------------------------------------------------------------------------------------|-------------|-----------------------------------------------------------------------------------|
| Thomas Reske,M.D.<br>University Medical Center<br>533 Bolivar St,<br>Room 509<br>New Orleans, LA, 70124<br>USA                          | Hospital or<br>Medical Center | USA | 3475-240-0708 | LSU Institutional Review Board<br>1501 Kings Hwy<br>Shreveport, LA 71103<br>USA                                                                             | 08-Feb-2017 | 9526                                                                              |
| Raed Al-Rajabi,M.D.<br>University of Kansas Cancer<br>Center<br>2330 Shawnee Mission Parkway<br>Suite 210<br>Westwood, KS, 66205<br>USA | Hospital or<br>Medical Center | USA | 3475-240-0711 | The University of Kansas Medical Center<br>Human Subjects Committee<br>3901 Rainbow Boulevard<br>Kansas University Hospital<br>Kansas City, KS 66160<br>USA | 09-Nov-2016 | Reviewing<br>IRB:<br>IRB00006196<br>FWA#<br>00003411<br>IRB#<br>STUDY000044<br>90 |

| <b>Primary Investigator/Facility Address*</b>                                                                                                                                | <b>Facility Description</b>   | <b>Country</b> | <b>Protocol # - Site #</b> | <b>IEC Name and Address**</b>                                                                               | <b>Date of Initial IRB Approval</b> | <b>Initial IRB approval number</b>                                                         |
|------------------------------------------------------------------------------------------------------------------------------------------------------------------------------|-------------------------------|----------------|----------------------------|-------------------------------------------------------------------------------------------------------------|-------------------------------------|--------------------------------------------------------------------------------------------|
| Asha Dhanarajan<br>Loyola University Medical Center<br>2160 S. First Ave. Cancer Center<br>Maywood, IL, 60153<br>USA                                                         | Hospital or<br>Medical Center | USA            | 3475-240-0712              | Loyola University Chicago Health Sciences<br>Division IRB<br>2160 S. First Ave.<br>Maywood, IL 60153<br>USA | 07-Oct-2016                         | 208865                                                                                     |
| Marcus Noel<br>University of Rochester<br>601 Elmwood Avenue Box 704<br>James P. Wilmot Cancer Center<br>Rochester, NY, 14642<br>USA                                         | Hospital or<br>Medical Center | USA            | 3475-240-0713              | Western IRB<br>1019 39th Avenue SE<br>Suite 120<br>Puyallup, WA 98374<br>USA                                | 27-Jul-2016                         | Study Num:<br>1167184<br>WIRB PRO<br>NUM:<br>20160210<br>ONLINE<br>TRACKING: 11-<br>358778 |
| Philip A. Philip, M.D./Anteneh A.<br>Tesfaye/Anthony Frank<br>Shields, M.D., Ph.D.<br>Karmanos Cancer Institute<br>3990 John R Street<br>HW04HO<br>Detroit, MI, 48201<br>USA | Hospital or<br>Medical Center | USA            | 3475-240-0714              | Western Institutional Review Board<br>1019 39th Avenue SE<br>Suite 120<br>Puyallup, WA 98374<br>USA         | 22-Jul-2016                         | Study Num:<br>1166959<br>WIRB PRO<br>NUM:<br>20160210<br>ONLINE<br>TRACKING: 11-<br>358778 |

|                                                                                                                                                                 |                                            |            |                      |                                                                                                                        |                    |                    |
|-----------------------------------------------------------------------------------------------------------------------------------------------------------------|--------------------------------------------|------------|----------------------|------------------------------------------------------------------------------------------------------------------------|--------------------|--------------------|
| <p>GENE SAYLORS,M.D.<br/> Charleston Hematology Oncology Associates PA<br/> 2085 Henry Tacklenburg Drive<br/> 2nd Floor<br/> Charleston, SC, 29414<br/> USA</p> | <p>Non Hospital<br/> Clinical Practice</p> | <p>USA</p> | <p>3475-240-0716</p> | <p>Copernicus Group Independent Review Board<br/> 5000 Centregreen Way<br/> Suite 200<br/> Cary, NC 27513<br/> USA</p> | <p>08-Jun-2016</p> | <p>MER1-16-040</p> |
| <p>Arvind Chaudhry<br/> Medical Oncology Associates<br/> 6001 N. Mayfair Street<br/> Spokane, WA, 99208<br/> USA</p>                                            | <p>Non Hospital<br/> Clinical Practice</p> | <p>USA</p> | <p>3475-240-0721</p> | <p>Copernicus Group Independent Review Board<br/> 5000 Centregreen Way<br/> Suite 200<br/> Cary, NC 27513<br/> USA</p> | <p>02-Aug-2016</p> | <p>MER1-16-040</p> |

| Primary Investigator/Facility Address*                                                                                                   | Facility Description           | Country | Protocol # - Site # | IEC Name and Address**                                                                                                                                                          | Date of Initial IRB Approval | Initial IRB approval number                                                                |
|------------------------------------------------------------------------------------------------------------------------------------------|--------------------------------|---------|---------------------|---------------------------------------------------------------------------------------------------------------------------------------------------------------------------------|------------------------------|--------------------------------------------------------------------------------------------|
| Gary Xiao<br>Drexel University College of Medicine<br>245 North 15th St.<br>12th Floor NCB Suite 12318<br>Philadelphia, PA, 19102<br>USA | Treatment Center               | USA     | 3475-240-0722       | Western IRB<br>1019 39th Avenue SE<br>Suite 120<br>Puyallup, WA 98374<br>USA                                                                                                    | 02-Aug-2016                  | Study Num:<br>1166672<br>WIRB PRO<br>NUM:<br>20160210<br>ONLINE<br>TRACKING: 11-<br>358778 |
| Fadi S. Braiteh<br>Comprehensive Cancer Centers of Nevada<br>3730 S. Eastern Ave<br>Las Vegas, NV, 89169<br>USA                          | Non Hospital Clinical Practice | USA     | 3475-240-0728       | Copernicus Group Independent Review Board<br>5000 Centregreen Way<br>Suite 200<br>Cary, NC 27513<br>USA                                                                         | 23-Aug-2016                  | MER1-16-040                                                                                |
| Aiwu Ruth He<br>Georgetown University Medical Center<br>3800 Reservoir Road, NW<br>Washington, DC, 20007<br>USA                          | Hospital or Medical Center     | USA     | 3475-240-0729       | MedStar Research Institute - Georgetown University Oncology Institutional Review Board<br>3900 Reservoir Road, NW Med/Dent Building, SW 104<br>Washington, DC 20057-2197<br>USA | 07-Dec-2016                  | 2016-1367                                                                                  |
| Moses Raj<br>Allegheny Health Network Cancer Institute<br>320 East North Avenue<br>Pittsburgh, PA, 15212<br>USA                          | Hospital or Medical Center     | USA     | 3475-240-0730       | Western Institutional Review Board<br>1019 39th Avenue SE<br>Suite 120<br>Puyallup, WA 98374<br>USA                                                                             | 30-Dec-2016                  | STUDY<br>NUM:<br>1171020<br>WIRB PRO<br>NUM:<br>20160210                                   |

|                                                                                                                           |                               |     |               |                                                                                                     |             |                                                                                               |
|---------------------------------------------------------------------------------------------------------------------------|-------------------------------|-----|---------------|-----------------------------------------------------------------------------------------------------|-------------|-----------------------------------------------------------------------------------------------|
|                                                                                                                           |                               |     |               |                                                                                                     |             | ONLINE TRACKING:<br>11-358778                                                                 |
| Steven Emmons<br>St. Mary's Hospital Regional<br>Cancer Center<br>750 Wellington Ave.<br>Grand Junction, CO, 81501<br>USA | Hospital or<br>Medical Center | USA | 3475-240-0731 | Western Institutional Review Board<br>1019 39th Avenue SE<br>Suite 120<br>Puyallup, WA 98374<br>USA | 09-Mar-2017 | STUDY<br>NUM:<br>1173423<br>WIRB PRO<br>NUM:<br>20162258<br>ONLINE<br>TRACKING:<br>11-1864777 |
| Alex Menter<br>Kaiser Permanente of Colorado<br>10240 Park Meadows Drive<br>Lone Tree, CO, 80124<br>USA                   | Treatment<br>Center           | USA | 3475-240-0732 | Kaiser Permanente IRB<br>2550 South Parker Rd<br>Aurora, CO 80014<br>USA                            | 25-Aug-2016 | IRB #: CO-16-<br>2393<br>Project #:<br>16011497                                               |

| Primary Investigator/Facility Address*                                                                                                   | Facility Description         | Country | Protocol # - Site # | IEC Name and Address**                                                                                                                                                         | Date of Initial IRB Approval | Initial IRB approval number                                                        |
|------------------------------------------------------------------------------------------------------------------------------------------|------------------------------|---------|---------------------|--------------------------------------------------------------------------------------------------------------------------------------------------------------------------------|------------------------------|------------------------------------------------------------------------------------|
| Juan Sanabria<br>Edwards Comprehensive Cancer Center<br>1400 Hal Greer Boulevard<br>Huntington, WV, 25701<br>USA                         | Hospital or Medical Center   | USA     | 3475-240-0733       | Marshall University School of Medicine and Medical Center<br>1245 15th St<br>Univ Physicians & Surgeons, Inc., Univ Physicans Internal Medicine<br>Huntington, WV 25701<br>USA | 09-Nov-2016                  | 967472-1                                                                           |
| Samuel Klempner, M.D.<br>The Angeles Clinic and Research Institute<br>11818 Wilshire Blvd.<br>Suite 200<br>Los Angeles, CA, 90025<br>USA | Non Hospital Clin Rsrch Site | USA     | 3475-240-0734       | Western Institutional Review Board<br>1019 39th Avenue SE<br>Suite 120<br>Puyallup, WA 98374<br>USA                                                                            | 23-Mar-2017                  | STUDY NUM:<br>1173785<br>WIRB PRO NUM:<br>2016210<br>ONLINE TRACKING:<br>11-358778 |
| Olugbenga Olowokure<br>University of Cincinnati<br>200 Albert Sabin Way, Suite 4002A<br>Cincinnati, OH, 45267<br>USA                     | Hospital or Medical Center   | USA     | 3475-240-0735       | Western Institutional Review Board<br>1019 39th Avenue SE<br>Suite 120<br>Puyallup, WA 98374<br>USA                                                                            | 21-Mar-2017                  | Study Num:<br>1169222<br>WIRB PRO NUM:<br>20160210<br>ONLINE TRACKING: 11-358778   |



|                                                                                                                                              |                               |     |               |                                                                                                               |             |                                                                                            |
|----------------------------------------------------------------------------------------------------------------------------------------------|-------------------------------|-----|---------------|---------------------------------------------------------------------------------------------------------------|-------------|--------------------------------------------------------------------------------------------|
| Ramya Thota<br>Intermountain Healthcare<br>5169 S. Cottonwood Street<br>Eccles Outpatient Building, Suite<br>610<br>Murray, UT, 84107<br>USA | Hospital or<br>Medical Center | USA | 3475-240-0736 | Intermountain Healthcare Urban Central<br>Region IRB<br>8th Ave. and C St.<br>Salt Lake City, UT 84143<br>USA | 12-Jan-2017 | 1050371                                                                                    |
| Ahmed Zakari<br>Florida Hospital Cancer Institute<br>2501 N. Orange Avenue, Suite<br>689<br>Orlando, FL, 32804<br>USA                        | Hospital or<br>Medical Center | USA | 3475-240-0737 | Western Institutional Review Board<br>1019 39th Avenue SE<br>Suite 120<br>Puyallup, WA 98374<br>USA           | 09-Aug-2016 | Study Num:<br>1168467<br>WIRB PRO<br>NUM:<br>20160210<br>ONLINE<br>TRACKING: 11-<br>358778 |
| Mark Huber<br>Avera Cancer Institute<br>1000 E. 23rd Street, Suite 320<br>Sioux Falls, SD, 57105<br>USA                                      | Treatment<br>Center           | USA | 3475-240-0738 | Avera Institutional Review Board<br>3900 West Avera Drive<br>Sioux Falls, SD 57108<br>USA                     | 18-Jan-2017 | 2016.086                                                                                   |

| <b>Primary Investigator/Facility Address*</b>                                                                                           | <b>Facility Description</b>     | <b>Country</b> | <b>Protocol # - Site #</b> | <b>IEC Name and Address**</b>                                                                                                                                   | <b>Date of Initial IRB Approval</b> | <b>Initial IRB approval number</b> |
|-----------------------------------------------------------------------------------------------------------------------------------------|---------------------------------|----------------|----------------------------|-----------------------------------------------------------------------------------------------------------------------------------------------------------------|-------------------------------------|------------------------------------|
| Jonathan S. Treisman, M.D.<br>Wheaton Franciscan Healthcare-<br>All Saints<br>7410 West Rawson Avenue<br>Franklin, WI, 53132<br>USA     | Treatment<br>Center             | USA            | 3475-240-0742              | Wheaton Franciscan Healthcare Southeast<br>Wisconsin IRB- Milwaukee<br>400 W. River Woods Parkway<br>Milwaukee, WI 53212<br>USA                                 | 22-Feb-2017                         | 1020                               |
| Eric J. Lawitz, M.D.<br>American Research Corporation<br>at Texas Liver Institute<br>607 Camden Street<br>San Antonio, TX, 78215<br>USA | Non Hospital<br>Clin Rsrch Site | USA            | 3475-240-0743              | Copernicus Group Independent Review<br>Board<br>5000 Centregreen Way<br>Suite 200<br>Cary, NC 27513<br>USA                                                      | 09-Nov-2016                         | MER1-16-040                        |
| Edward J Kim, M.D.<br>UC Davis Comprehensive Cancer<br>Center<br>4501 X Street, Suite 3016<br>Sacramento, CA, 95817<br>USA              | Hospital or<br>Medical Center   | USA            | 3475-240-0745              | University of California Davis Medical<br>Center IRB<br>2921 Stockton Blvd. Ste.1400<br>CTSC Bldg., Rm. 1429, IRB Administration<br>Sacramento, CA 95817<br>USA | 20-Feb-2017                         | 1021051-2                          |
| Dan Costin<br>White Plains Hospital Center for<br>Cancer Care<br>2 Longview Ave.<br>3rd Floor<br>White Plains, NY, 10601<br>USA         | Hospital or<br>Medical Center   | USA            | 3475-240-0746              | White Plains Hospital<br>2 Longview Ave<br>White Plains, NY 10601<br>USA                                                                                        | 03-Feb-2017                         | Not available                      |

|                                                                                                                               |                               |     |               |                                                                                                                                                          |             |                                                   |
|-------------------------------------------------------------------------------------------------------------------------------|-------------------------------|-----|---------------|----------------------------------------------------------------------------------------------------------------------------------------------------------|-------------|---------------------------------------------------|
| Philip Edward Lammers, M.D.<br>Nashville General Hospital<br>1005 Dr. D. B. Todd Jr. Boulevard<br>Nashville, TN, 37208<br>USA | Hospital or<br>Medical Center | USA | 3475-240-0747 | Meharry Medical College Institutional<br>Review Board<br>1005 Dr. D. B. Todd, Jr. Blvd.<br>WBS Bldg - Attn: Cynthia Weaver<br>Nashville, TN 37208<br>USA | 07-Feb-2017 | eProtocol ID:<br>16-12-640<br>C/N:<br>170201PL020 |
| Vaibhav Sahai<br>University of Michigan<br>1500 E. Medical Center Dr.<br>Ann Arbor, MI, 48109<br>USA                          | Hospital or<br>Medical Center | USA | 3475-240-0748 | University of Michigan Med School<br>Institutional Review Board<br>Argus I Building<br>517 W. William<br>Ann Arbor, MI 48103<br>USA                      | 14-Apr-2017 | HUM00123343                                       |

| Primary Investigator/Facility Address*                                                                                                                         | Facility Description       | Country | Protocol # - Site # | IEC Name and Address**                                                                                                                                                                                                   | Date of Initial IRB Approval | Initial IRB approval number |
|----------------------------------------------------------------------------------------------------------------------------------------------------------------|----------------------------|---------|---------------------|--------------------------------------------------------------------------------------------------------------------------------------------------------------------------------------------------------------------------|------------------------------|-----------------------------|
| Marcelo Garrido<br>Pontificia Universidad Catolica de Chile<br>Diagonal Paraguay 319<br>Piso 2<br>Santiago, Region M. de Santiago, 8330032<br>Chile            | Hospital or Medical Center | Chile   | 3475-240-0781       | Comite etico cientifico Facultad de medicina<br>Pontificia Universidad Catolica de Chile<br>Marcoleta 391 Piso 1<br>Santiago, Region M. de Santiago 8330024<br>Chile                                                     | 02-Aug-2016                  | 16-097                      |
| Jamil Asselah<br>McGill University Health Centre<br>1001 boul Decarie<br>Room C04.0119<br>Montreal, QC, H4A 3J1<br>Canada                                      | Hospital or Medical Center | Canada  | 3475-240-0801       | MUHC Centre for Applied Ethics<br>2155 Guy St., 7th Floor<br>Room C7-118<br>Montreal, QC H3H 2R9<br>Canada<br>MUHC Centre for Applied Ethics<br>2155 Guy Street<br>2nd Floor. Room 231<br>Montreal, QC H3H 2R9<br>Canada | 22-Dec-2016                  | 2017-2591                   |
| Ravi Ramjeesingh<br>QEII Health Sciences Centre<br>5790 University Avenue<br>QEII HSC Centre for Clinical Research. Room 123<br>Halifax, NS, B3H 1V7<br>Canada | Hospital or Medical Center | Canada  | 3475-240-0802       | Nova Scotia Health Authority Research Ethics Board<br>5790 University Ave. Room 118<br>Centre for Clinical Research - Research Ethics Board<br>Halifax, NS B3H 1V7<br>Canada                                             | 08-Dec-2016                  | 1021672                     |

|                                                                                                              |                               |        |               |                                                                                                                                     |             |                      |
|--------------------------------------------------------------------------------------------------------------|-------------------------------|--------|---------------|-------------------------------------------------------------------------------------------------------------------------------------|-------------|----------------------|
| Vincent C Tam,DR.<br>Tom Baker Cancer Centre<br>1331 29 Street NW<br>Calgary, AB, T2N 4N2<br>Canada          | Hospital or<br>Medical Center | Canada | 3475-240-0803 | Health Research Ethics Board of Alberta -<br>HREBA<br>1500-10104 103 Ave NW<br>Cancer Committee<br>Edmonton, AB T5J 0H8<br>Canada   | 13-Oct-2016 | HREBA.CC-<br>16-0734 |
| Rakesh Goel<br>Ottawa Hospital Regional Cancer<br>Centre<br>501 Smyth Road.<br>Ottawa, ON, K1H 8L6<br>Canada | Hospital or<br>Medical Center | Canada | 3475-240-0804 | OCREB - Ontario Cancer Research Ethics<br>Board<br>661 University Avenue<br>MaRS Centre. Suite 510<br>Toronto, ON M5G 0A3<br>Canada | 05-Jun-2017 | 17-010               |

| Primary Investigator/Facility Address*                                                                                                                                                             | Facility Description       | Country | Protocol # - Site # | IEC Name and Address**                                                                                                        | Date of Initial IRB Approval | Initial IRB approval number |
|----------------------------------------------------------------------------------------------------------------------------------------------------------------------------------------------------|----------------------------|---------|---------------------|-------------------------------------------------------------------------------------------------------------------------------|------------------------------|-----------------------------|
| Kevin Zbuk<br>Juravinski Cancer Center<br>699 Concession Street<br>Hamilton, ON, L8V 5C2<br>Canada                                                                                                 | Hospital or Medical Center | Canada  | 3475-240-0805       | OCREB - Ontario Cancer Research Ethics Board<br>661 University Avenue MaRS Centre. Suite 510<br>Toronto, ON M5G 0A3<br>Canada | 05-Jun-2017                  | 17-010                      |
| Yoo-Joung Ko<br>Sunnybrook Health Sciences, Odette Cancer Centre<br>2075 Bayview Avenue<br>T2-143. Sunnybrook Health Sciences Centre. OCC Clinical Research Dept<br>Toronto, ON, M4N 3M5<br>Canada | Hospital or Medical Center | Canada  | 3475-240-0806       | OCREB - Ontario Cancer Research Ethics Board<br>661 University Avenue MaRS Centre. Suite 510<br>Toronto, ON M5G 0A3<br>Canada | 05-Jun-2017                  | 17-010                      |
| Koji Ogawa<br>Hokkaido University Hospital<br>Kita 14jo Nishi 5, Kita-ku<br>Sapporo, Hokkaido, 060-8648<br>Japan                                                                                   | Hospital or Medical Center | Japan   | 3475-240-0841       | Hokkaido University Hospital Institutional Review Board<br>Kita 14jo Nishi 5, Kita-ku<br>Sapporo, Hokkaido 060-8648<br>Japan  | 19-Jul-2016                  | 16035                       |

\* If the original investigator has been replaced, that investigator's name is followed by a slash (/) and the replacement investigator's name.

\*\* Name(s) of Committee Chair/Alternate and Individual IEC members available upon request.

**Online Supplementary Fig. 1.** Kaplan-Meier estimate of time to progression for pembrolizumab and placebo assessed by BICR per RECIST v1.1.

Tick marks indicate censored observations.

BICR, blinded independent central review; RECIST v1.1, Response Evaluation Criteria in Solid Tumors, version 1.1; TTP, time to progression.

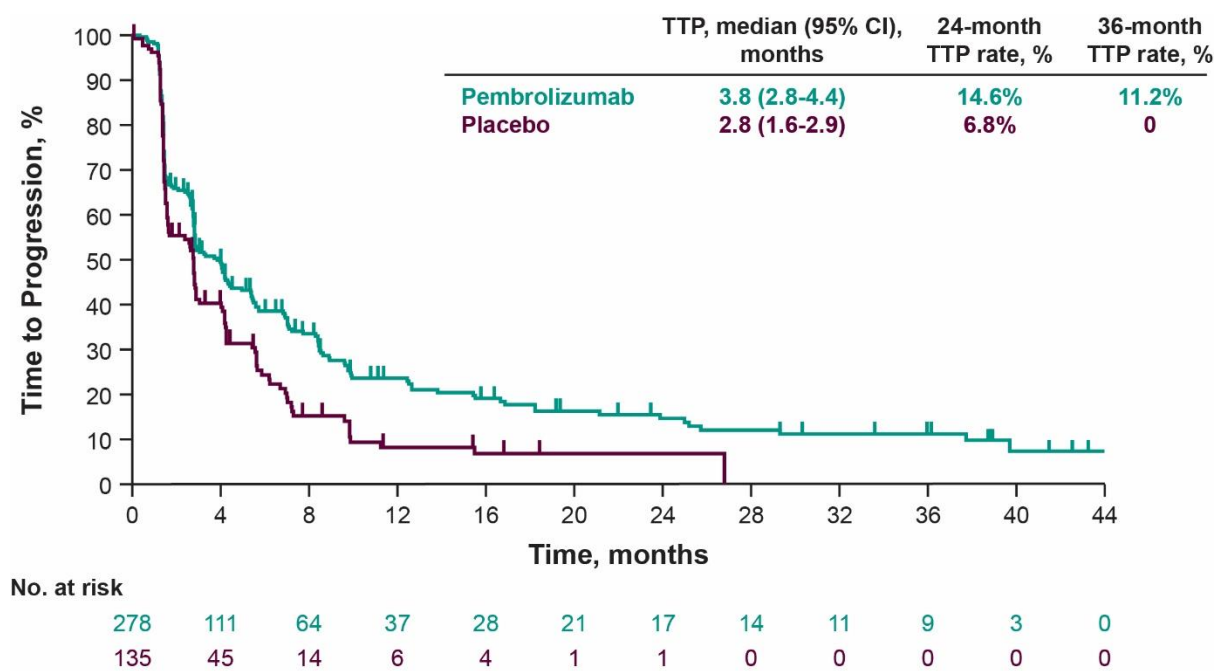

**Online Supplementary Fig. 2.** Landmark analysis of OS from week 6 after randomization in the pembrolizumab arm by responder versus nonresponder status at week 6.

<sup>a</sup>From product limit (Kaplan-Meier) method for censored data.

<sup>b</sup>Based on the Cox proportional hazards regression model with Efron’s method for handlingties, with responder status by the landmark time as a single covariate.

Analyses were performed in the ITT population. Objective response was assessed by BICR per RECIST v1.1.

BICR, blinded independent central review; ITT, intent to treat; RECIST v1.1, Response Evaluation Criteria in Solid Tumors, version 1.1.

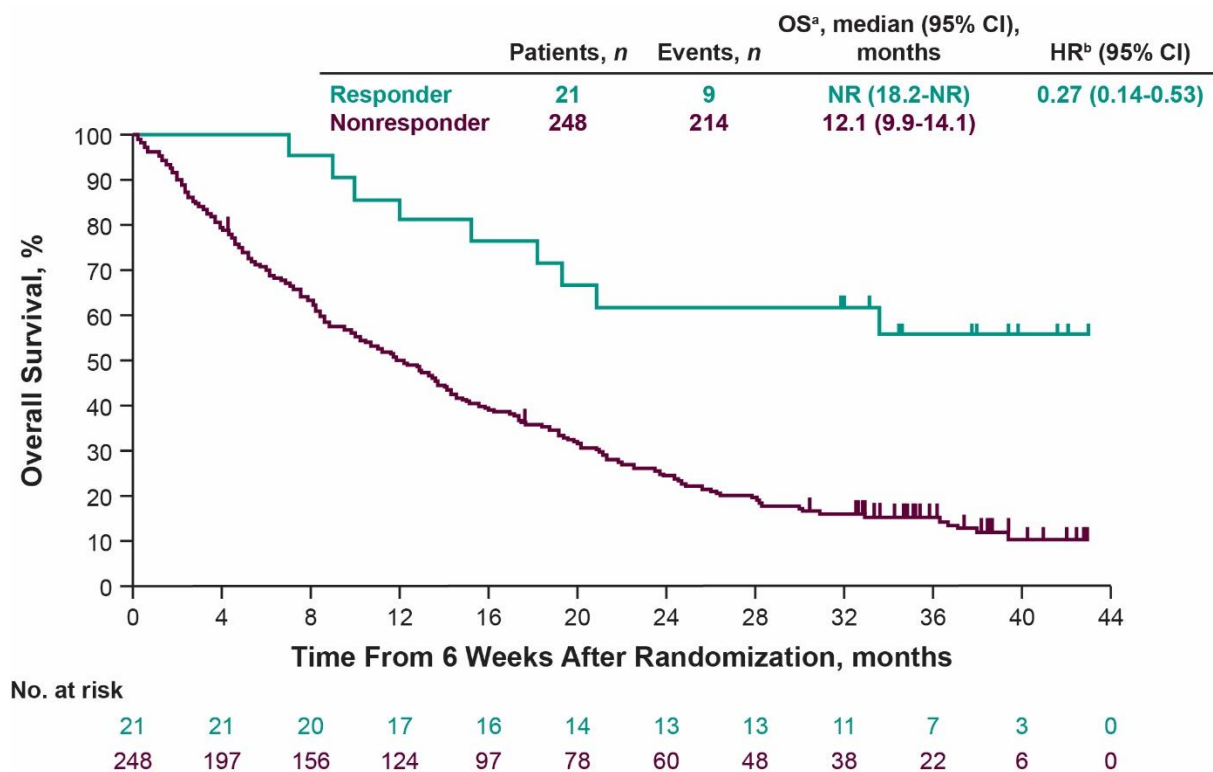



**Online Supplementary Fig. 3.** Landmark analysis of OS from week 12 after randomization in the pembrolizumab arm by responder versus nonresponder status at week 12.

<sup>a</sup>From product limit (Kaplan-Meier) method for censored data.

<sup>b</sup>Based on the Cox proportional hazards regression model with Efron’s method for handling ties, with responder status by the landmark time as a single covariate.

Analyses were performed in the ITT population. Objective response was assessed by BICR per RECIST v1.1.

BICR, blinded independent central review; ITT, intent to treat; RECIST v1.1, Response Evaluation Criteria in Solid Tumors, version 1.1.

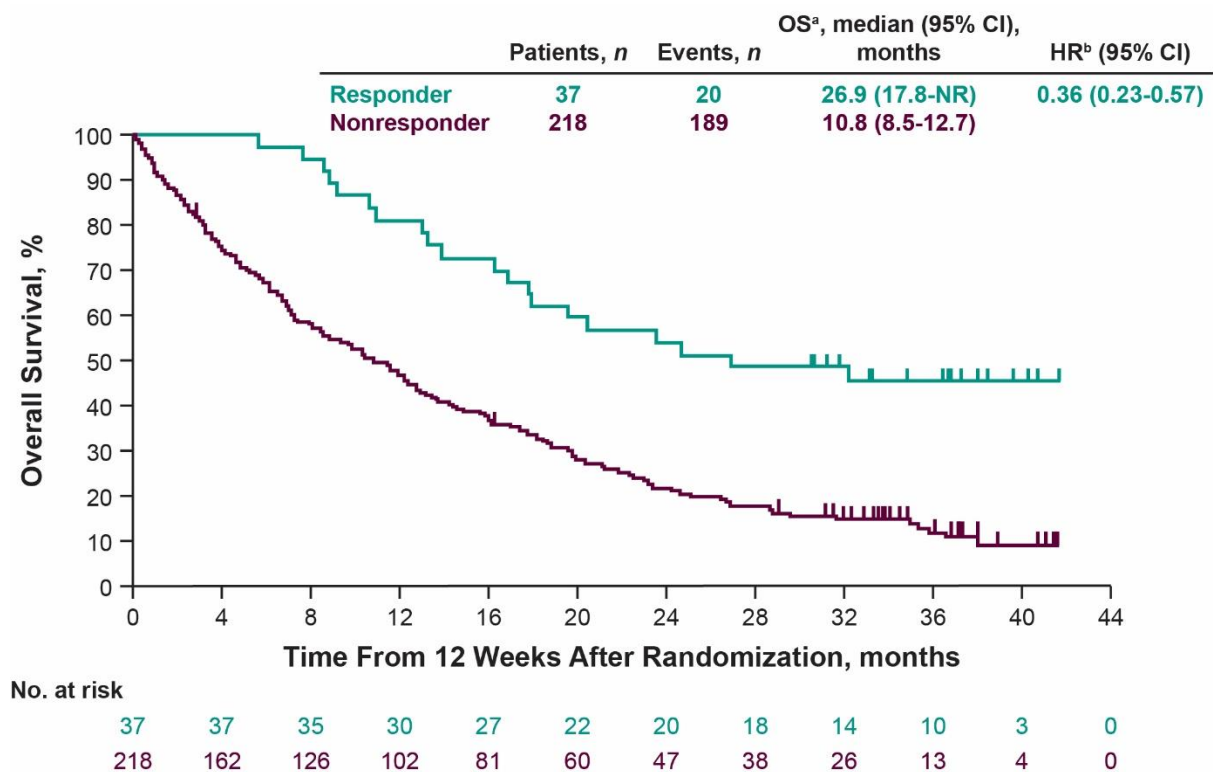

**Online Supplementary Fig. 4.** Landmark analysis of OS from week 18 after randomization in the pembrolizumab arm by responder versus nonresponder status at week 18.

<sup>a</sup>From product limit (Kaplan-Meier) method for censored data.

<sup>b</sup>Based on the Cox proportional hazards regression model with Efron’s method for handling ties, with responder status by the landmark time as a single covariate.

Analyses were performed in the ITT population. Objective response was assessed by BICR per RECIST v1.1.

BICR, blinded independent central review; ITT, intent to treat; RECIST v1.1, Response Evaluation Criteria in Solid Tumors, version 1.1.

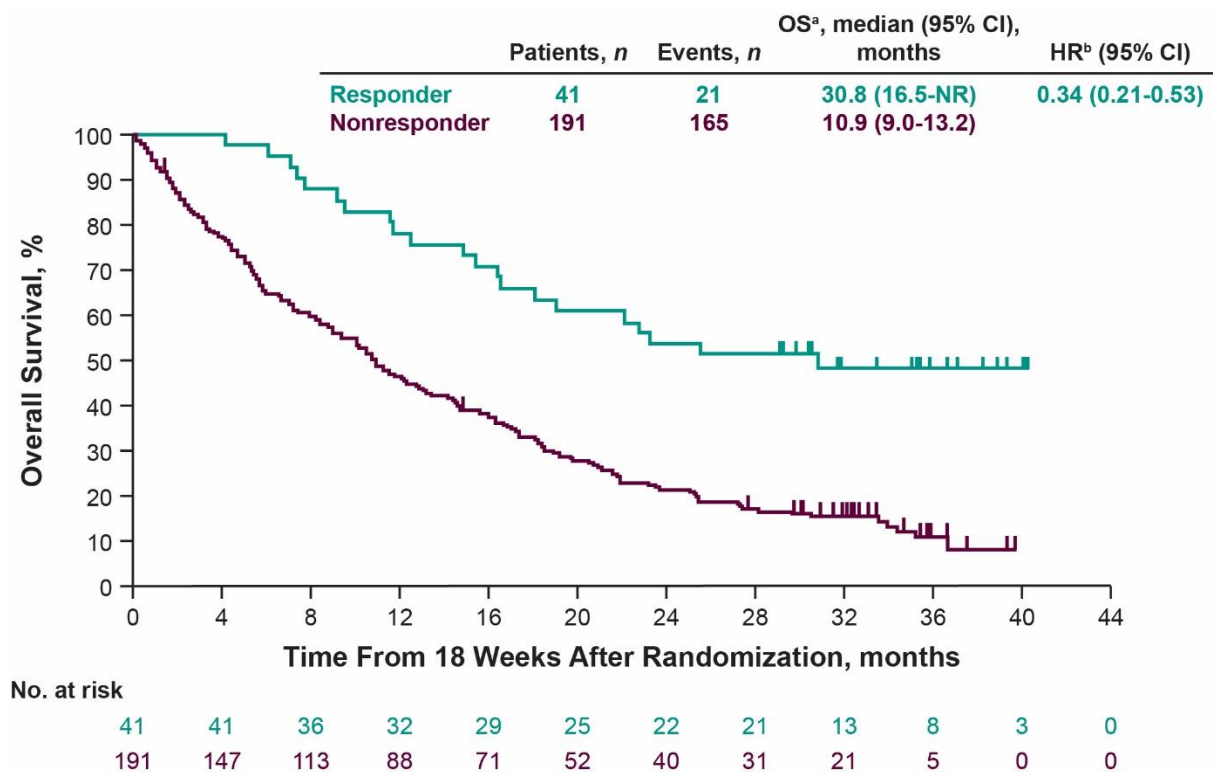

Supplement: Supplementary_material-Suppl.1-s1.pdf [file Supplementary_material-Suppl.1-s1.pdf]
